1 RESEARCH ARTICLE

2 **Morphofunctional analysis of antigen uptake mechanisms following**  
3 **sublingual immunotherapy with beads in mice**

4 **Running title:** Routes of antigen uptake through the sublingual mucosa

5 Yaser Hosny Ali Elewa<sup>1,2\*</sup>, Tatsuya Mizoguchi<sup>2</sup>, Osamu Ichii<sup>2</sup>, Teppei Nakamura<sup>2,4</sup>, Yasuhiro  
6 Kon<sup>2</sup>

7

8 <sup>1</sup>Department of Histology and Cytology, Faculty of Veterinary Medicine, Zagazig University,  
9 Zagazig, Egypt, <sup>2</sup>Faculty of Veterinary Medicine, Basic Veterinary Sciences, Laboratory of  
10 Anatomy, Hokkaido University, Sapporo, Japan, <sup>4</sup>Section of Biological Science, Chitose  
11 Laboratory, Japan Food Research Laboratories, Chitose, Japan,

12

13 **\* Correspondence:**

14 Dr. Yaser Elewa, Laboratory of Anatomy, Basic Veterinary Sciences, Faculty of Veterinary  
15 Medicine, Hokkaido University, Kita18-Nishi 9, Kita-ku, Sapporo, Hokkaido, 060-0818, Japan.  
16 Tel.: +81-11-706-5188; Fax: +81-11-706-5189; E-mail: [y-elewa@vetmed.hokudai.ac.jp](mailto:y-elewa@vetmed.hokudai.ac.jp)  
17 [yaserelewa@zu.edu.eg](mailto:yaserelewa@zu.edu.eg)

18

19

20

21

## 22 **Abstract**

### 23 Background

24 Recently, sublingual immunotherapy (SLIT) has been used as a safe and efficient method for the  
25 treatment of and immunization against asthma and various allergies. However, the routes of antigen  
26 uptake through the mucosa of the oral cavity remain incompletely understood, as do the roles of sex  
27 and age in the process. For this purpose, to elucidate the mechanism and efficacy of SLIT among  
28 different sexes and ages microbeads were dripped into the sublingual region to mimic antigen uptake  
29 by the sublingual mucosa.

### 30 Methods

31 Twenty microliters of either phosphate buffered saline (PBS) or fluorescently labelled microbeads  
32 (latex and silica beads) were placed under the tongue of both male and female C57BL/6 mice at young  
33 (3 months) and old (6 months) ages. The lower jaw was examined 30 min after administration, and  
34 beads were detected with a fluorescence stereomicroscope. Morphological observations of the  
35 mucosa of the fluorescent areas were made with scanning electron microscopy (SEM) and an all-in-  
36 one light fluorescence microscope (LM). Fluorescence intensity was compared between both sexes  
37 and ages.

### 38 Results

39 Stereomicroscopic observation revealed fluorescent illuminations in three compartments of the  
40 sublingual mucosa: the sublingual caruncles (SC), the oral rostral mucosa (OR) and the buccal

41 mucosa (BM). Interestingly, the fluorescence intensity tended to be higher among females than  
42 among males in the SC region in particular. However, there were no significant age-related  
43 differences. SEM and LM revealed beads in the lumina of both mandibular ducts and sublingual ducts  
44 (Sd). Additionally, the apical cytoplasm of some Sd cells contained silica beads. However, there were  
45 no specification in the OR mucosa or BM.

#### 46 Conclusions

47 This study reveals the major role Sd play in local immunity via the antigen uptake mechanisms.

48 Furthermore, our data suggest that the efficacy of SLIT in humans could be affected by sex.

49 **Keywords:** antigen uptake, beads, sublingual immunotherapy, sublingual caruncles, C57BL/6 mice

## 50 INTRODUCTION

51 In both humans and animals, the prevalence of allergic diseases such as seasonal rhinitis and atopic  
52 dermatitis has increased substantially in recent decades [1-3]. The symptoms accompanying such  
53 allergic conditions range in severity. Mild symptoms such as itching and sneezing may cause  
54 disturbances in the patient's daily life and affect productivity, while severe ones such as anaphylactic  
55 shock can be life-threatening [4]. Therefore, establishing countermeasures against the development  
56 of allergic conditions is an important issue in both the medical and veterinary fields.

57 Treatment for allergic diseases is currently based primarily on symptomatic therapy to reduce  
58 inflammation; antihistamines and steroids are widely used for this [5, 6]. However, immune induction  
59 therapy has attracted attention in recent years. Among them is sublingual immunotherapy (SLIT),  
60 which is allergen-specific. In SLIT, the allergens or antigens are administered to the lower part of the  
61 tongue and may provide sustained and safe therapeutic effects [7-9]. With this method, the amount  
62 of antigen administered to the lower part of the tongue is gradually increased to induce immune  
63 tolerance and improve the patient's hypersensitivity symptoms [10]. Interestingly, because SLIT  
64 administration and postoperative management are so straightforward, recently there has been  
65 increasing interest in the clinical application of SLIT in humans [11], as well as in the treatment of  
66 atopy and mite allergies in dogs [12].

67 Antigen uptake through the sublingual mucosa following SLIT is the mechanism by which antigen-  
68 specific immune tolerance is induced. Therefore, immunological and morphologic functional

69 evaluations of the oral mucosa are essential for further characterizing this mechanism. From an  
70 immunological point of view, several previous reports have suggested that antigen-presenting cells  
71 “APCs” (dendritic cells, macrophages) and regulatory T-cells in the sublingual mucosa play a role in  
72 antigen uptake and induction of immune tolerance following SLIT [13-17]. Furthermore, a recent  
73 report revealed the role of APCs in sublingual ductal epithelial cells in the transportation of sublingual  
74 antigen. This was shown using soluble antigens such as ovalbumin and particulate antigens such as  
75 *E. coli*, latex beads (Lt) and silica beads (Si) [18]. Moreover, it has been revealed that bacterial  
76 infection of the salivary glands may result from bacteria ascending through salivary gland ducts and  
77 stasis of salivary flow through the ducts [19]. This suggests that salivary gland ducts play a role in  
78 antigen uptake. After morphological analysis of the different compartments of the oral mucosa, their  
79 roles in antigen uptake remains unclear. Interestingly, sexual dimorphism of the rodent  
80 submandibular gland granular duct (granular convoluted tubule) has been reported [20]. Further, it  
81 has been revealed that aging affects the structure of salivary glands [21]. However, there have been  
82 no reports regarding differences in the therapeutic efficacy of SLIT between patients of different  
83 sexes or ages. Therefore, in this study we morphologically analyzed the bead accumulation sites in  
84 the oral cavity mucosa of young and old mice of both sexes following sublingual administration of  
85 either Lt or Si. The accumulation sites reflect the specific anatomic regions of antigen uptake. We  
86 found that the bead-derived fluorescence was mainly observed in the dorsal part of the sublingual  
87 caruncle (SC), as well as in the oral rostral (OR) and buccal mucosa (BM) of the oral cavity proper.

88 Interestingly, the fluorescence intensity was higher in the SC and OR mucosa than that in the BM.  
89 Further, the females tended to demonstrate higher intensity than males. In the Lt but not Si beads  
90 group, significant sex differences were observed, especially in the SC region. However, no significant  
91 age-related changes were observed in either bead group. We suggest that the localization of the beads  
92 could be affected by the sex and the material of the bead. Furthermore, we suggest that the dorsal part  
93 of the SC may play an important role in local immunity related to antigen uptake mechanism.  
94

## 95 **MATERIALS AND METHODS**

96

### 97 *Ethics Statement*

98 The investigators conducted experiments in accordance with the guidelines for the Care and Use of  
99 Laboratory Animals, Hokkaido University, Graduate School of Veterinary Medicine (certified by the  
100 Association for Assessment and Accreditation of Laboratory Animal Care International). All  
101 experiments were conducted according to the protocols approved by the Institutional Animal Care  
102 and Use Committee of the Graduate School of Veterinary Medicine, Hokkaido University, Japan  
103 (approval No. 15-0079).

104

### 105 *Experimental animals and experimental design*

106 Male and female C57BL/6N (B6) mice of both young age (12-16 ws) and old age (24-36 ws) were  
107 purchased from Japan SLC (Hamamatsu, Japan) and were used for each experiment. They were  
108 anesthetized via intraperitoneal administration of a mixture of medetomidine (0.3 mg/kg), midazolam  
109 (4.0 mg/kg) and butorphanol (5.0 mg/kg). Subsequently, male and female mice of each age received  
110 20  $\mu$ L of either phosphate buffered saline (PBS) (control groups) or 1% fluorescence-labelled beads  
111 suspended in PBS (experimental groups) on the lower part of the tongue after the tongues were raised  
112 with tweezers (S1a Fig.). The experimental groups were subdivided into a latex (Lt) group, which  
113 received latex beads (Fluoresbrite <sup>TM</sup> YG carboxylate microspheres, diameter 0.75  $\mu$ m, 1%

114 Polyscience, Warrington, PA., USA), and a silica (Si) group, which received silica beads (diameter  
115 0.8  $\mu\text{m}$ , 50 mg/mL; Micromod Partikel technologie GmbH, Warnemurende, Germany). Thirty min  
116 after the beads were applied, the common carotid artery was cut, and the mice were euthanized by  
117 exsanguination. The lower jaw was then separated from the upper one and washed with 0.01 M PBS.

118

119 *For stereoscopic microscopic observation*

120 The sublingual mucosa was examined with a stereomicroscope after cutting the free tip of the tongue.  
121 The sites of fluorescently labelled bead accumulation were observed and photographed using the  
122 fluorescent stereomicroscope (AXIO ZOOM-V 16, ZEISS, Tokyo, Japan) for all experimental groups  
123 and compared with the control group.

124

125 *Tissue preparation for light microscopic observation*

126 Following fixation of the lower jaw in either 10% neutral buffered formalin at 4 °C for 24 hr or 4%  
127 paraformaldehyde (4 °C, overnight), the samples were decalcified in formic acid at room temperature  
128 for 2 days. After washing the samples in PBS three times, 5 min each, the sublingual region was  
129 separated just caudal to the SC region under the stereoscopic microscope. The sublingual region was  
130 then dehydrated in ascending grades of alcohol, and embedded in paraffin. Three  $\mu\text{m}$  serial paraffin  
131 sections of the sublingual region were prepared, stained with hematoxylin and eosin (HE). The stained



132 sections were then observed and photographed using BZ-X710 all-in-one fluorescence microscope  
133 (Keyence, Osaka, Japan).

134

135 *Tissue preparation for scanning electron microscopy*

136 In the silica bead and control groups, the lower jaw was fixed with 2.5% glutaraldehyde (4 °C,  
137 overnight). Thereafter, it was immersed six times in a 0.1 M PBS (pH 7.4) for 10 minutes each.  
138 Subsequently, at 4 °C, the samples were rinsed in a 0.5% tannic acid solution for 10 minutes and  
139 1.0% tannic acid solution for 1 hour, and then in 0.1 M phosphoric acid. After washing in PBS for  
140 15 min, the specimens were dehydrated stepwise using a series of graded ethanol. After dehydration,  
141 the samples were transferred into a mixture of 100% ethyl alcohol and isoamyl acetate (1:1), then  
142 kept for 20 min twice in isoamyl acetate solution, and dried in a critical point drier (HCP-2, Hitachi,  
143 Tokyo, Japan). Thereafter, the dried samples were fixed on aluminum stubs with double-faced  
144 adhesive tabs. Surface treatment with a 20-nm thick platinum layer was carried out with ion sputtering  
145 (E-1030, Hitachi, Tokyo, Japan) for 1 min. The samples were then observed and photographed using  
146 a scanning electron microscope (SU 8000 field emission scanning electron microscope, Hitachi,  
147 Tokyo, Japan, conditions of 10 kV).

148

149 *Histoplanimetry*

150 To calculate the fluorescence detection rate within different sublingual compartments of both the Lt  
151 and Si bead groups, the number of samples in which fluorescence was observed in the SC, OR, and  
152 BM mucosa was calculated and divided by the total number of analyzed samples. Moreover, for  
153 evaluation of the fluorescence intensity as an indicator of bead accumulation, images from the  
154 experimental group samples were captured. Following this, the photographed image was  
155 monochromatized using JTrim (free software, manufactured by Woody Bells, Japan). Thereafter, the  
156 luminance was measured ten times (ImageJ; NZH, Bethesda, MD, USA) at each site of the SC, OR  
157 and BM. The average value was quantified and defined as the fluorescence intensity. This value was  
158 then compared with the control non- fluorescent area.

159

#### 160 *Statistical analysis*

161 Significant difference of the fluorescence intensities in the measurement sites (SC, OR, BM) when  
162 compared to that of negative control area in each group was analyzed by the Dunnett t method after  
163 the Kruskal-Wallis test. The differences of the fluorescence intensities between groups were  
164 compared using the Scheffé's method after the Kruskal-Wallis test. The analysis of the gender and  
165 age group differences was applied by Mann-Whitney *U* test. In all analysis, a *P* value < 0.05 was  
166 regarded as a significant difference.

167

168 **RESULTS**

169 *Morphological observation of sublingual mucosa in mouse lower jaw following PBS or bead*  
170 *administration*

171 In the experimental group, the fluorescently labelled bead accumulations in the sublingual mucosa  
172 were mainly observed in three sites: the caudal protrusion that represent the SC; two lateral sides that  
173 represent the BM; and at a depression in the median rostral position just behind the incisor teeth that  
174 represents the OR and appeared as an elliptical fluorescence accumulation site. An area with weak  
175 fluorescent illuminations cranial to the SC was used as a negative control area (S1b and c Figs.). With  
176 SEM, the SC appeared as a paired mucosal protrusion of average width 400  $\mu\text{m}$ . The BM appeared  
177 as two lateral grooves extending toward the rostral side at the boundary between the buccal mucosa  
178 and the bottom of the oral cavity proper. The OR appeared as a median depression (about 150  $\mu\text{m}$   $\times$   
179 700  $\mu\text{m}$ ) on the caudal side of the lower incisor teeth (S1c Fig.). In the control group, no fluoresce  
180 could be observed by fluorescent stereomicroscope (S1d Fig.).

181

182 *Fluorescence detection rates and intensities in SC, BM, and OR among young and old ages of both*  
183 *sexes*

184 As shown in Table 1, we compared the fluorescence detection rates in the SC, BM, and OR sites in  
185 young and old groups of males and females in both Lt and Si bead experimental groups. In the Lt  
186 bead experiment group, the fluorescence was detected at a rate as high as 100% of the average

187 detection rate of all groups in the OR site. The average detection rate in the SC was 87.5%. The BM  
 188 had lower values than the other two sites (69%). The old female group had a detection rate of 100%  
 189 at all three sites. In the Si bead experimental groups, the young and old female group showed 100%  
 190 detection rate in the OR and the SC. The detection rate in the old males group was 75%. Furthermore,  
 191 the average fluorescence detection rate in the BM among all groups was lower than the other two  
 192 sites (50%).

193 **Table 1. Fluorescence detection rate (percentage) of the both Si and Lt beads among different**  
 194 **sites, ages, and sexes.**

|                             | Sublingual |              | Buccal |
|-----------------------------|------------|--------------|--------|
| <b>A- Latex bead group</b>  | caruncle   | Oral rostral | mucosa |
| Young male                  | 75.0       | 100.0        | 50.0   |
| Young female                | 100.0      | 100.0        | 75.0   |
| Old male                    | 75.0       | 100.0        | 50.0   |
| Old female                  | 100.0      | 100.0        | 100.0  |
| <b>Average</b>              | 87.5       | 100.0        | 68.8   |
| <b>B- Silica bead group</b> |            |              |        |
| Young male                  | 100.0      | 100.0        | 50.0   |
| Young female                | 100.0      | 100.0        | 50.0   |
| Old male                    | 75.0       | 75.0         | 25.0   |
| Old female                  | 100.0      | 100.0        | 75.0   |
| <b>Average</b>              | 93.8       | 93.8         | 50.0   |

195 Additionally, we analyzed the fluorescence detection and intensities in both Lt and Si bead groups  
 196 among young and old groups, as well as among male and female (Fig. 1). In Lt bead administration,  
 197 the females in both young and old groups tended to exhibit stronger fluorescence at all sites (SC, OR,  
 198 and BM) than males did (Figs. 1a-d). Interestingly, the SC in females showed stronger fluorescently  
 199 labelled bead accumulations (Figs. 1b, and d) than those in males (Figs. 1a, and c) in both age groups.

200 However, neither sex nor age-related changes were observed in the OR and BM. On the other hand,  
201 weaker fluorescently labelled bead accumulations were observed in the Si bead group than that in the  
202 Lt group at all sites. Further, in the Si bead group, the fluorescently labelled bead accumulations  
203 tended to be slightly stronger in the SC than other sites (data not shown).

204

205 To determine variations in bead accumulations among both the Lt and Si bead groups and among  
206 both ages and sexes, the fluorescence intensity was quantified by an image analysis method in all  
207 accumulation sites (Figs. 1e, and f) in comparison with the negative control area (reference value =  
208 1.0) (Fig. S1b). In the Lt bead group, the fluorescence intensity in the SC, OR, and BM tended to  
209 have a higher value than in the negative control area in both age and sex groups. The intensity had  
210 significantly higher values in the SC of the young male group and young female group and the BM  
211 of the young female group. Furthermore, significant differences in SC fluorescence intensity were  
212 found between males and females in both the young and adult groups (Fig. 1e).

213

214 In the Si bead group, as with the Lt group, the SC tended to have a higher value than the negative  
215 control area in all groups. Moreover, except for the young male group, the fluorescence intensity in  
216 the SC was significantly higher than in the negative control area. Additionally, the fluorescence  
217 intensity in the SC of the young female and old male groups was significantly higher than in the BM.

218 On the other hand, there was no sex difference as in the Lt bead group (Fig. 1e). No significant age-  
219 related changes were observed in both bead groups (Figs. 1e, and f).

220

221 *SEM and light microscopic observations of the structure of sublingual mucosa in mouse lower jaw*

222 SEM observation of the mucosal surface morphology among both sexes revealed that there were no  
223 remarkable differences between sexes. The SEM observation revealed that the SC in the control group  
224 (female, 3 months old) appeared as a pair of right and left protrusions. A groove was observed in the  
225 central part of the protrusion extending toward the rostral side. In addition, a deep depression  
226 (approximately 30  $\mu\text{m}$  long and 10  $\mu\text{m}$  short) was seen on the dorsal surface of the caudal side of the  
227 SC (Figs. 2a, b). The dorsal surface of this depression was smooth; however, the surface of the edge  
228 that bordered the depression showed fine folds (Fig. 2c). The SEM of the dorsal surface of the SC in  
229 the Si bead group revealed numerous beads around the depression on the dorsal surface of the caudal  
230 side of the SC and along the groove extending in the SC (Figs. 2d-f). The Si beads were observed as  
231 spherical particles of well-defined size (Fig. 2g).

232

233 We then examined the distribution of fluorescently labelled Si beads in H&E stained paraffin sections.  
234 The two sublingual and mandibular ducts opened separately into the sublingual mucosa (Figs. 3, and  
235 4a-f). The sublingual ducts (Sd) opened directly into the sublingual mucosa (Figs. 3a-f); however, the  
236 mandibular ducts opened into the ventral and median side of the SC (Figs. 4a-f). The epithelium lining

237 the submucosa was keratinized stratified squamous type, but it became non-keratinized at the opening  
238 of both ducts (Figs. 3 d-f, and 4d-f). Numerous fluorescently labelled Si beads were observed on the  
239 dorsal surface of the sublingual mucosa, especially that of the SC and near the opening of the  
240 sublingual ducts (Figs. 3a-f). Moreover, beads were observed in the lumina of both ducts (Figs. 3 e-  
241 f, and 4e-f). Interestingly, fluorescently labelled Si beads were observed in the apical cytoplasm of  
242 some cells lining the sublingual ducts (Figs. 3h-k), but not that in the mandibular ducts (Figs. 4e-f).

243

244 The SEM observation of the BM in both control (Fig. 4g) and Si bead group (Figs. 4h-i) revealed the  
245 smooth surface of the BM. In the experimental groups, Si beads could be observed on the dorsal  
246 surface of the BM, but fewer in number than that in the SC, OR (Fig. 4i). Examination of the H&E  
247 stained serial sections revealed a slight recess representing the BM (Figs. 4a-c) in which few Si beads  
248 were observed (Figs. 4j-l). The epithelium lining the BM was keratinized stratified but of thinner  
249 thickness the surrounding epithelium, and consisted of 2-3 layers (Figs. 4a-c, and 4j-l).

250

251 The SEM observation of the OR of the control group revealed a shallow median depression with a  
252 smooth dorsal surface and edge (Figs. 5a-c). In experimental groups, many Si beads were observed  
253 both on the dorsal surface and in the groove (Figs. 5d-f). In the H&E stained sections, the mucosa of  
254 the OR showed a shallow depression that was lined by keratinized stratified squamous epithelium of

255 slightly thinner thickness than the surrounding mucosa. Few Si beads were observed attaching to the  
256 outer keratinized layer (Figs. 5g-l).  
257



258 **DISCUSSION**

259 SLIT is an effective and safe therapy that has recently been established as a valid method for the  
260 treatment of many allergic diseases via the induction of antigen-specific tolerance. It has been used  
261 to treat allergic diseases in humans such as allergic rhinitis, allergic rhinoconjunctivitis, and asthma  
262 [22-28], as well as those in animals, such as canine atopic dermatitis [2, 29]. Several approaches  
263 involving analysis of the immunological status of the oral mucosa have been used to elucidate the  
264 mechanism of antigen uptake following SLIT [13 -15]. After morphological analysis of the different  
265 compartments of the oral mucosa, their roles in antigen uptake remains unclear. Therefore, we  
266 undertook a detailed morphological characterization of the sublingual mucosa. This was achieved by  
267 administering fluorescent beads into the sublingual region to mimic antigen uptake and induce  
268 antigen-specific immune tolerance.

269

270 Our data revealed three main sites within the oral cavity where beads accumulated following their  
271 sublingual administration (SC, OR, and BM). These sites could reflect the locations where substances  
272 tend to stagnate anatomically or the sites where antigen can be up taken. Interestingly, our data  
273 revealed that within the same mice, beads accumulated in varying degrees in the three anatomic sites  
274 of the sublingual mucosa. The SC, OR, and BM showed higher, moderate, and lower tendency for  
275 accumulations, respectively. A previous report explained that there are three features of the oral  
276 epithelium (thickness, keratinization, and rete ridges) that could significantly alter allergen capture

277 following sublingual allergen immunotherapy [30]. In support of this, our study revealed substantial  
278 bead accumulation on the dorsal surface of the SC. There was especially heavy near the central groove  
279 of the SC and the deep depression, representing the opening sites of the mandibular and sublingual  
280 ducts, respectively. Moreover, our SEM and light microscopic data revealed two features of the duct  
281 openings that could improve antigen uptake. First, there were abrupt changes in the surface of the  
282 duct openings from the surrounding smooth surface. Second, there was a transition of epithelium  
283 from keratinized to nonkeratinized at the site of duct openings.

284 The epithelium lining both the OR and BM were stratified squamous type but had a lower cell  
285 thickness than that of the surrounding. Additionally, in the OR site, a shallow depression was  
286 observed that could provide greater opportunity for antigen accumulation. In sum, our data suggested  
287 that the degree of bead accumulation at different sites could be due to variations in the local  
288 environment of the oral cavity, such as the keratinization and morphological variations.

289

290 In our investigation, we observed Si beads accumulating in the apical cytoplasm of some cells lining  
291 the sublingual ducts but not in the mandibular ducts. This observation is supported by a previous  
292 report concerning the role of the sublingual ductal system in incorporating and delivering sublingual  
293 antigens to ductal antigen-presenting cells [18]. Interestingly, in this previous report M cells were  
294 observed in the gastrointestinal mucosa and demonstrated the ability to take up antigen by  
295 phagocytosis [30, 31]. We believe that some cells within the epithelial lining of the sublingual duct

296 phagocytosed beads into their apical cytoplasm. These could be considered “M-like cells,” and may  
297 play a major role in the antigen uptake mechanism. However, in previous studies some serum  
298 components such as albumin have been reported to migrate from capillaries to saliva via interstitial  
299 fluid [32, 33]. Despite the fact that the molecular weight of albumin (66 kDa) is greater than some  
300 allergens such as cedar pollen allergens (36 kDa), there have been no reports demonstrating that  
301 allergens migrate from saliva into blood. Therefore, some other mechanism besides antigen uptake  
302 may be responsible for the effectiveness of SLIT. Further investigations are required.

303

304 Interestingly, a recent comparative study revealed that rodents and especially mice, could be used as  
305 animal models for pharmacodynamics/efficacy studies of SLIT [17]. Therefore, another goal of our  
306 investigation was to examine whether age and sex affect the efficacy of SLIT in mice. We found no  
307 remarkable difference in mucosal surface morphology between sexes. Interestingly, our data showed  
308 some variations in Lt bead accumulation between sexes, but none in Si bead accumulation. This is  
309 despite the fact that both types of beads were of equal size. Notably, in the Lt bead group, females  
310 tended to exhibit more fluorescence intensity at all observation sites, and significant sex differences  
311 were observed in the SC. However, such sex differences were not observed in the Si bead group.  
312 Variations between these groups may be due to the surface structure of the beads and their interaction  
313 or adhesion with mucous membranes. Additionally, the contents of saliva differ between male and  
314 female mice. This is attributable to the sexual dimorphism of intervening ducts in the mandibular

315 gland [20]. Thus, we believe that variations in the oral environments of male and female mice could  
316 affect adhesion or uptake of beads into mucous membranes. In particular, the local environmental of  
317 the female oral mucosa may contribute to the accumulation of latex beads.

318

319 In conclusion, our investigation revealed the major role of some sublingual ductal epithelial cells in  
320 the antigen uptake mechanism following SLIT. Furthermore, our data revealed possible sex-related  
321 differences in the efficacy of SLIT. Specifically, females demonstrated a greater tendency toward  
322 bead accumulation. However, further investigations are required. This may include examining the  
323 effect of cyclic changes in female mice on bead accumulation.

324

## 325 **Supporting information**

326 S1 Fig. Morphological observation of sublingual mucosa in mouse lower jaw following PBS or beads  
327 administration. (a) Method of sublingual administration with a 20 $\mu$ l micropipette of either PBS or  
328 beads to the lower part of the mouse's tongue after raising the tongue. (b) Fluorescent  
329 stereomicroscopic image of the sublingual mucosa after cutting the anterior end of the tongue in the  
330 experimental group (latex beads, 3-month-old males). Notice fluorescently labelled bead  
331 accumulations in the sublingual caruncle (SC), buccal mucosa (BM), and oral rostral (OR) in front of  
332 the incisor teeth (IT) with no fluorescence detected in the negative control area (CA). (c) SEM image

333 of the previous areas. (d) Fluorescent stereomicroscopic image of the sublingual mucosa in the control  
334 group. Notice the absence of fluorescent staining. Scale bar = 1 mm.

335

336

337

338

339

340

341

342

343

344

345

346

347 **References**

- 348 1. Sakurai Y, Nakamura , K. Teruya K, Shimada N, Umeda T, Tanaka H, et al. Prevalence and risk  
349 factors of allergic rhinitis and cedar pollinosis among Japanese men. *Prev Med.* 1998; 27: 617-  
350 622. <https://doi.org/10.1006/pmed.1998.0336> PMID: 9672957
- 351 2. Nødtvedt A, Egenvall A, Bergvall K, Hedhammar A. Incidence of and risk factors for atopic  
352 dermatitis in a Swedish population of insured dogs. *Vet Rec.* 2006; 159: 241-246.  
353 <http://dx.doi.org/10.1136/vr.159.8.241> PMID: 16921013
- 354 3. Diesel A. Cutaneous hypersensitivity dermatoses in the feline patient: a review of allergic skin  
355 disease in cats. *Vet Sci.* 2017; 4: 25. <http://doi: 10.3390/vetsci4020025> PMID: 29056684  
356
- 357 4. Muñoz-Cano R, Pascal M, Araujo G, Goikoetxea MJ, Valero AL, Picado C, et al. Mechanisms  
358 cofactors and augmenting factors involved in anaphylaxis. *Front Immunol.* 2017; 8: 1193.  
359 <https://doi: 10.3389/fimmu.2017.01193> PMID: 29018449  
360
- 361 5. Townley, RG, Suliaman F. The mechanism of corticosteroids in treating asthma. *Ann Allergy.*  
362 1987; 58: 1-6. PMID: 3026210  
363
- 364 6. Ciprandi G, Tosca M, Passalacqua G, Canonica GW, Ricca V, Landi M. Continuous antihistamine

- 365 treatment controls allergic inflammation and reduces respiratory morbidity in children with mite  
366 allergy. *Allergy*. 1999; 54: 358-365. [https:// doi.org/10.1034/j.1398-9995.1999. 00920.x](https://doi.org/10.1034/j.1398-9995.1999.00920.x) PMID:  
367 10371095
- 368
- 369 7. Dahl R, Kapp A, Colombo G, Monchy JGR, Rak S, Emminger W, et al. Sublingual grass allergen  
370 tablet immunotherapy provides sustained clinical benefit with progressive immunological  
371 changes over 2 years. *J Allergy Clin Immunol*. 2008; 121: 512-518.  
372 <https://doi.org/10.1016/j.jaci.2007.10.039> PMID:18155284
- 373
- 374 8. Ott H, Sieber J, Brehler R, Fölster-Holst R, Kapp A, Klimek L, et al. Efficacy of grass pollen  
375 sublingual immunotherapy for three consecutive seasons and after cessation of treatment: the  
376 ECRIT study. *Allergy*. 2009; 64: 1394-1401. <https://doi.org/10.1111/j.1398-9995.2008.01875.x>  
377 PMID: 19764942
- 378
- 379 9. Zhong C, Yang W, Li Y, Zou L, Deng Z, Liu M, and Huang X. Clinical evaluation for sublingual  
380 immunotherapy with *Dermatophagoides farinae* drops in adult patients with allergic asthma. *Ir. J.*  
381 *Med. Sci*. 2017; 1-6. <http://doi: 10.1007/s11845-017-1685-x>. PMID: 29032417
- 382
- 383 10. Jay DC, and Nadeau KC. Immune mechanisms of sublingual immunotherapy. *Curr Allergy*

- 384 Asthma Rep. 2014; 14: 473. <http://doi: 10.1007/s11882-014-0473-1> PMID:25195100
- 385
- 386 11. Zielen S, Devillier P, Heinrich J, Richter H, Wahn U. Sublingual immunotherapy provides long-
- 387 term relief in allergic rhinitis and reduces the risk of asthma: a retrospective, real-world database
- 388 analysis. *Allergy*. 2018; 73: 165-177. <http://doi: 10.1111/all.13213> PMID: 28561266
- 389
- 390 12. DeBoer DJ, Verbrugge M, Morris M. Clinical and immunological responses of dust mite sensitive,
- 391 atopic dogs to treatment with sublingual immunotherapy (SLIT). *Vet Dermatol*. 2016; 27: 82-
- 392 e24. <http://doi: 10.1111/vde.12284> PMID: 26749020
- 393 13. Hovav A-H. Dendritic cells of the oral mucosa. *Mucosal Immunol*. 2014; 7: 27-37.
- 394 <http://doi:10.1038/mi.2013.42> PMID: 23757304
- 395
- 396
- 397 14. Mascarell L, Lombardi V, Louise A, Saint-Lu N, Chabre H, Moussu H, et al. Oral dendritic cells
- 398 mediate antigen-specific tolerance by stimulating TH1 and regulatory CD4+ T cells. *J Allergy*
- 399 *Clin Immunol*. 2008; 122: 603-609. <https://doi.org/10.1016/j.jaci.2008.06.034> PMID: 18774396
- 400
- 401 15. Mascarell L, Rak S, Worm M, Melac M, Soulie S, Lescaille G, et al. Characterization of oral
- 402 immune cells in birch pollen-allergic patients: impact of the oral allergy syndrome and sublingual



- 403 allergen immunotherapy on antigen-presenting cells. *Allergy*. 2015; 70: 408-419. [http://doi:](http://doi:10.1111/all.12576)  
404 [10.1111/all.12576](http://doi:10.1111/all.12576) PMID: 25631199
- 405
- 406 16. Zhang C, Ohno T, Kang S, Takai T, Azuma M. Repeated antigen painting and sublingual  
407 immunotherapy in mice convert sublingual dendritic cell subsets. *Vaccine*. 2014; 32: 5669-5676.  
408 [http://doi: 10.1016/j.vaccine.2014.08.013](http://doi:10.1016/j.vaccine.2014.08.013) PMID: 25168308
- 409
- 410 17. Thirion-Delalande C, Gervais F, Fisch C, Cuine J, Baron-Bodo V, Moingeon P, et al. Comparative  
411 analysis of the oral mucosae from rodents and non-rodents: application to the nonclinical  
412 evaluation of sublingual immunotherapy products. *PLoS ONE*. 2017; 12 (9): e0183398.  
413 <https://doi.org/10.1371/journal.pone.0183398> PMID: 28886055
- 414 18. Nagai Y, Shiraishi D, Tanaka Y, Nagasawa Y, Ohwada S, Aso H, et al. Transportation of  
415 sublingual antigens across sublingual ductal epithelial cells to the ductal antigen-presenting cells  
416 in mice. *Clin. Exper. Allergy*. 2014; 45: 677-686. [http://doi: 10.1111/cea.12329](http://doi:10.1111/cea.12329) PMID: 24773115
- 417
- 418 19. Brook I. The bacteriology of salivary gland infections. *Oral Maxillofac Surg Clin North Am*.  
419 2009; 21: 269-274. [http://doi: 10.1016/j.coms.2009.05.001](http://doi:10.1016/j.coms.2009.05.001) PMID: 19608044
- 420
- 421 20. Amano O, Mizobe K, Bando Y, Sakiyama K. Anatomy and histology of rodent and human major

- 422       salivary glands. *Acta Histochem Cytochem.* 2012; 45: 241-250. <http://doi: 10.1267/ahc.12013>
- 423       PMID: 23209333
- 424
- 425   21. Nagler RM. Salivary glands and the aging process: mechanistic aspects, health-status and
- 426       medicinal-efficacy monitoring. *Biogerontology.* 2004; 5: 223-233. <http://doi:10.1023/B:>
- 427       BGEN.0000038023.36727.50 PMID: 15314272
- 428   22. Wilson DR, Torres LI, Durham SR. Sublingual immunotherapy for allergic rhinitis. *Cochrane*
- 429       Database Syst. Rev. 2003. CD002893. <http://doi:10.1002/14651858> PMID: 12804442
- 430
- 431   23. Pajno GB, Peroni DG, Vita D, Pietrobelli A, Parmiani S, Boner AL. Safety of sublingual
- 432       immunotherapy in children with asthma. *Paediatr. Drugs.* 2003; 5: 777-781. PMID: 14580226
- 433
- 434   24. Passalacqua G, Guerra L, Pasquali M, Lombardi C, Canonica GW. Efficacy and safety of
- 435       sublingual immunotherapy. *Ann. Allergy Asthma Immunol.* 2004; 93: 3-12. <http://doi:>
- 436       10.1016/S1081-1206(10)61440-8 PMID: 15281466
- 437
- 438   25. Penagos M, Compalati E, Tarantini F, Baena-Cagnani R, Huerta J, Passalacqua G, et al. Efficacy
- 439       of sublingual immunotherapy in the treatment of allergic rhinitis in pediatric patients 3 to 18 years
- 440       of age: a meta-analysis of randomized, placebo-controlled, double-blind trials. *Ann. Allergy*

- 441 Asthma Immunol. 2006. 97: 141-148. [http://doi: 10.1016/S1081-1206\(10\)60004-X](http://doi:10.1016/S1081-1206(10)60004-X) PMID:  
442 16937742  
443
- 444 26. Mascarell L, Van Overtvelt L, Moingeon P. Novel ways for immune intervention in  
445 immunotherapy: mucosal allergy vaccines. *Immunol Allergy Clin North Am.* 2006; 26: 283-306,  
446 vii-viii. <http://doi:10.1016/j.iac.2006.02.009> PMID: 16701145
- 447 27. Dahl R, Kapp A, Colombo G, de Monchy JG, Rak S, Emminger W, et al. Efficacy and safety of  
448 sublingual immunotherapy with grass allergen tablets for seasonal allergic rhinoconjunctivitis. *J*  
449 *Allergy Clin Immunol.* 2006; 118: 434-440. [http://doi: 10.1016/j.jaci.2006.05.003](http://doi:10.1016/j.jaci.2006.05.003) PMID:  
450 16890769  
451
- 452 28. Didier A, Malling HJ, Worm M, Horak F, Jager S, Montagut A, et al. Optimal dose, efficacy, and  
453 safety of once-daily sublingual immunotherapy with a 5-grass pollen tablet for seasonal allergic  
454 rhinitis. *J Allergy Clin Immunol.* 2007; 120: 1338-1345. [http://doi: 10.1016/j.jaci.2007.07.046](http://doi:10.1016/j.jaci.2007.07.046)  
455 PMID: 17935764  
456
- 457 29. Marsella R. Tolerability and clinical efficacy of oral immunotherapy with house dust mites in a  
458 model of canine atopic dermatitis: a pilot study. *Vet. Dermatol.* 2010; 21: 566-571. [http://doi:  
459 10.1111/j.1365-3164.2010.00890.x](http://doi:10.1111/j.1365-3164.2010.00890.x) PMID: 20492623

460

461 30. Hase K, Ohno H. Epithelial cells as sentinels in mucosal immune barrier. *Clin Immunol.* 2006;  
462 29: 16-26. [http://doi: 10.2177/jsci.29.16](http://doi:10.2177/jsci.29.16) PMID: 16505599

463

464 31. Kimura S. Molecular insights into the mechanisms of M-cell differentiation and transcytosis in  
465 the mucosa-associated lymphoid tissues. *Anat Sci Int.* 2017; 1-12. [http://doi: 10.1007/s12565-](http://doi:10.1007/s12565-017-0418-6)  
466 017-0418-6 PMID: 29098649

467

468 32. Vining FV, McGinley RA, Symons RG. Hormones in saliva: mode of entry and consequent  
469 implications for clinical interpretation. *Clin Chem.* 1983; 29: 1752-1756. PMID: 6225566

470

471 33. Pfaffe T, Cooper-White J, Beyerlein P, Kostner K, Punyadeera C. Diagnostic potential of saliva:  
472 current state and future applications. *Clin Chem.* 2011; 57: 675-687. [http://doi:](http://doi:10.1373/clinchem.2010.153767)  
473 10.1373/clinchem.2010.153767 PMID: 21383043

474

475

476

477

478 **Figure legends**

479 Fig. 1. Localization of fluorescent beads in the oral mucosa of the lower jaw in the latex beads group  
480 (a-d). Fluorescence microscopy observation in both the young group (a and b) and old group (c and  
481 d). Notice stronger fluorescence in the young and old female groups than in male groups in particular  
482 for SC (white arrow). Scale bars = 1 mm. Graphs showing the fluorescence intensities in both Lt (e)  
483 and Si (f) bead groups. The fluorescence intensity was measured for the SC, OR, BM, and the  
484 numerical value was obtained by scoring the negative control value as 1.0. Values are given as the  
485 mean  $\pm$  SE, n= 4. \*: Significant difference in the measurement sites (SC, OR, BM) from the negative  
486 control in each group (Kruskal-Wallis test, Dunnett t method, P <0.05). †: Significant difference  
487 between sexes (Mann-Whitney *U* test), ‡: Significant difference between sites (Kruskal-Wallis test,  
488 Scheffé's method).

489

490 Fig. 2. SEM of the dorsal surface of the SC of the control group (female, 3 months old) (a-c) and  
491 silica bead group (d-g). (a) The SC are observed as a pair of left and right protrusions. Notice the  
492 central grooves (arrows) and recessed dorsal aspect (arrow heads). Scale bar = 100  $\mu$ m. (b) Higher  
493 magnification of the white framed area in (a). The entrance to the recess can be seen in the center.  
494 Notice the boundary between the mucosal epithelial cells of the SC and the epithelial cells constituting  
495 the edge of the recess (white frame). Scale bar = 20  $\mu$ m. (c) Higher magnification of the white boxed  
496 area in (b). Notice the smooth surface (S) of the mucosal lining the SC and fine folded surface (F)

497 lining the entrance to the recess. Scale bar = 10  $\mu\text{m}$ . (d) SEM of the dorsal surface of the SC of the  
498 experimental group (female, 3 months old). Notice the accumulation of silica beads in the periphery  
499 around the tip of the SC (red box) and in the recessed part (blue box) on the dorsal side. Scale bar =  
500 100  $\mu\text{m}$ .(e) Higher magnification of the blue boxed area in (d). Notice numerous silica beads adherent  
501 to the mucosal surface around the recess. (f) Higher magnification of the red boxed area in (d). (g)  
502 Higher magnification of the boxed area in (f). Notice the silica beads with a spherical uniform shape.  
503 (d-g) Scale bars = 15  $\mu\text{m}$ .

504 Fig. 3. Fluorescence microscopic observation of the sublingual mucosa at the SC level. (a-c)  
505 Fluorescence microscopic images of H&E stained sections of the mandibular duct (Md) and the  
506 opening of the sublingual ducts (Sd) into the sublingual mucosa. Notice separate openings of the Md  
507 and Sd and numerous fluorescent beads accumulating (arrows) on the sublingual mucosa at the SC  
508 region and at the opening of the Sd. (d-f) Fluorescence microscopic images of H&E stained sections  
509 of the opening of the Sd. Notice the change of the keratinized epithelium (arrow heads) to non-  
510 keratinized type at the opening of the Sd (arrows). (g-i) The wall of the mandibular duct (Md) and  
511 the sublingual ducts (Sd). (j, k) Higher magnifications of the boxed areas in figure (h, i). Notice  
512 fluorescence beads in the apical cytoplasm of some ductal lining cells (dashed arrows).

513 Fig. 4. (a-c) Fluorescence microscopic observation of the sublingual mucosa at the levels of the BM  
514 and the opening of Md into the SC. Notice the opening of the Md into the SC (solid box) and the  
515 presence of a slight recess (R) representing the BM. (d-f) Higher magnifications of the boxed areas

516 in figure (a-c). Notice the fluorescent beads in the lumen of the Md (arrows). (g-i) SEM of the dorsal  
517 surface of the BM of a 3-month-old female mouse of the control group (g), and the experimental  
518 group (h, i). Notice the smooth dorsal surface of the BM and several Si beads (arrows). (j-l) Higher  
519 magnifications of the dashed boxed areas in figure (a-c). Notice the fluorescent beads in the recess  
520 (arrows).

521 Fig. 5. (a-f) SEM of the dorsal surface of the OR of a 3-month-old female mouse of the control group  
522 (a-c), and the experimental group (d-f). Notice a shallow depression (D) with a smooth dorsal surface  
523 and a smooth edge. A moderate number of beads were observed in the experimental group (arrows).  
524 (g-i) Fluorescence microscopic observation of the sublingual mucosa at the OR level. Notice the slight  
525 depression of the mucosa and decreased thickness of the lining epithelium compared to the  
526 surrounding epithelium. (j-l) Higher magnifications of the dashed boxed areas in figure (a-c). Notice  
527 the few fluorescent beads attached to the keratinized epithelium (arrows).

528

529

530

531

**Male****Female**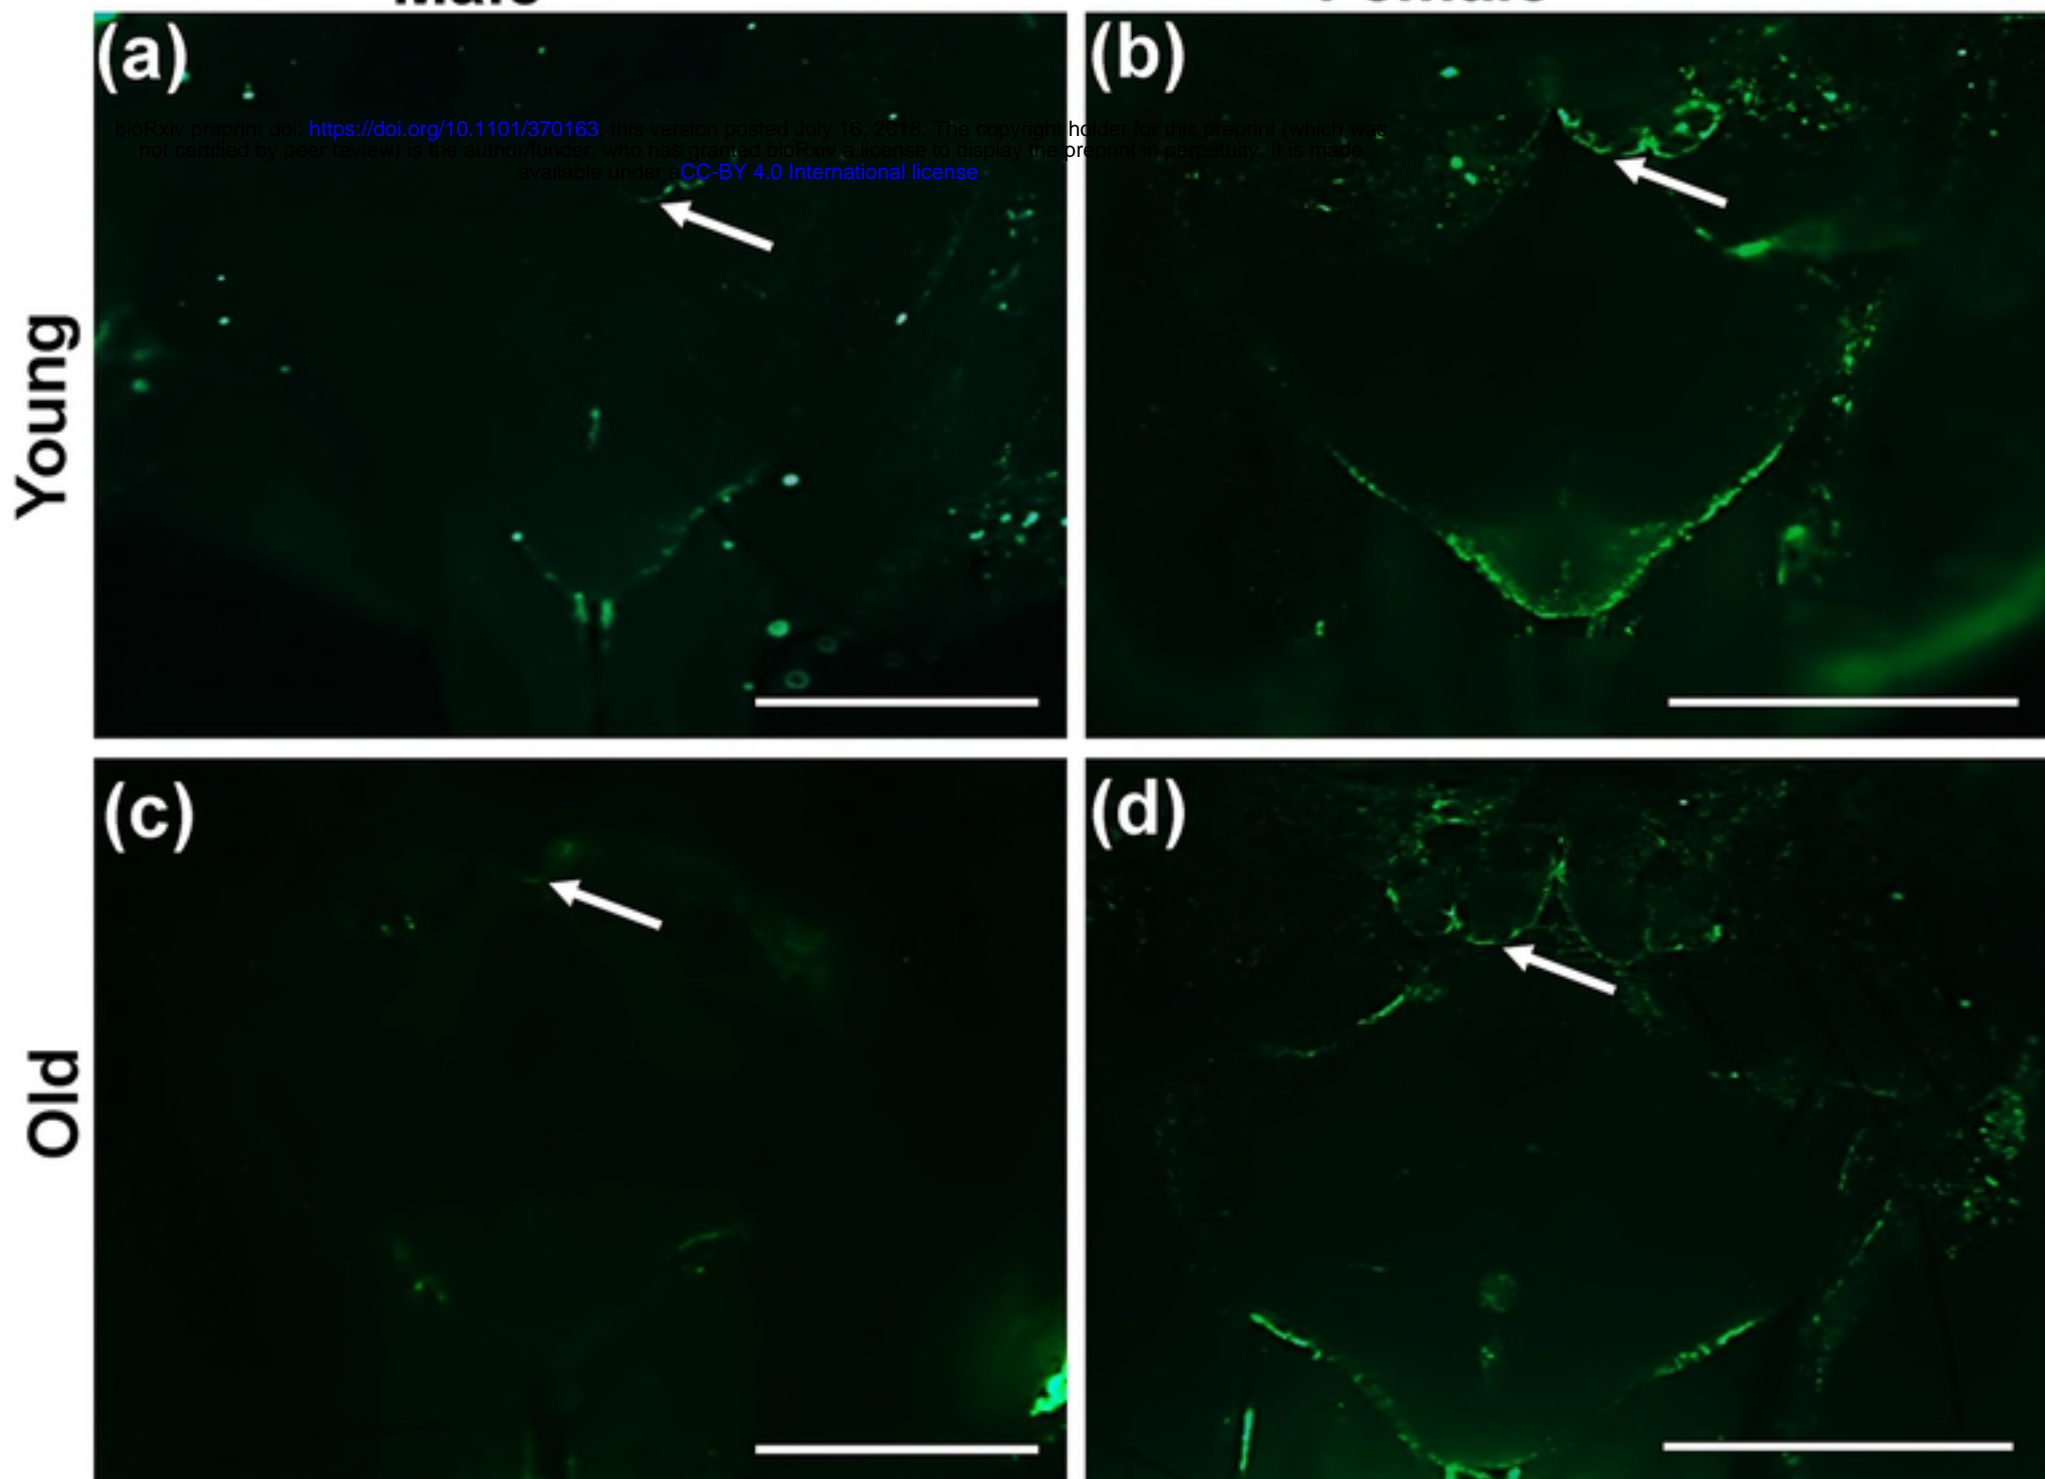

**(e) Latex beads fluorescence intensity** **(f) Silica beads fluorescence intensity**

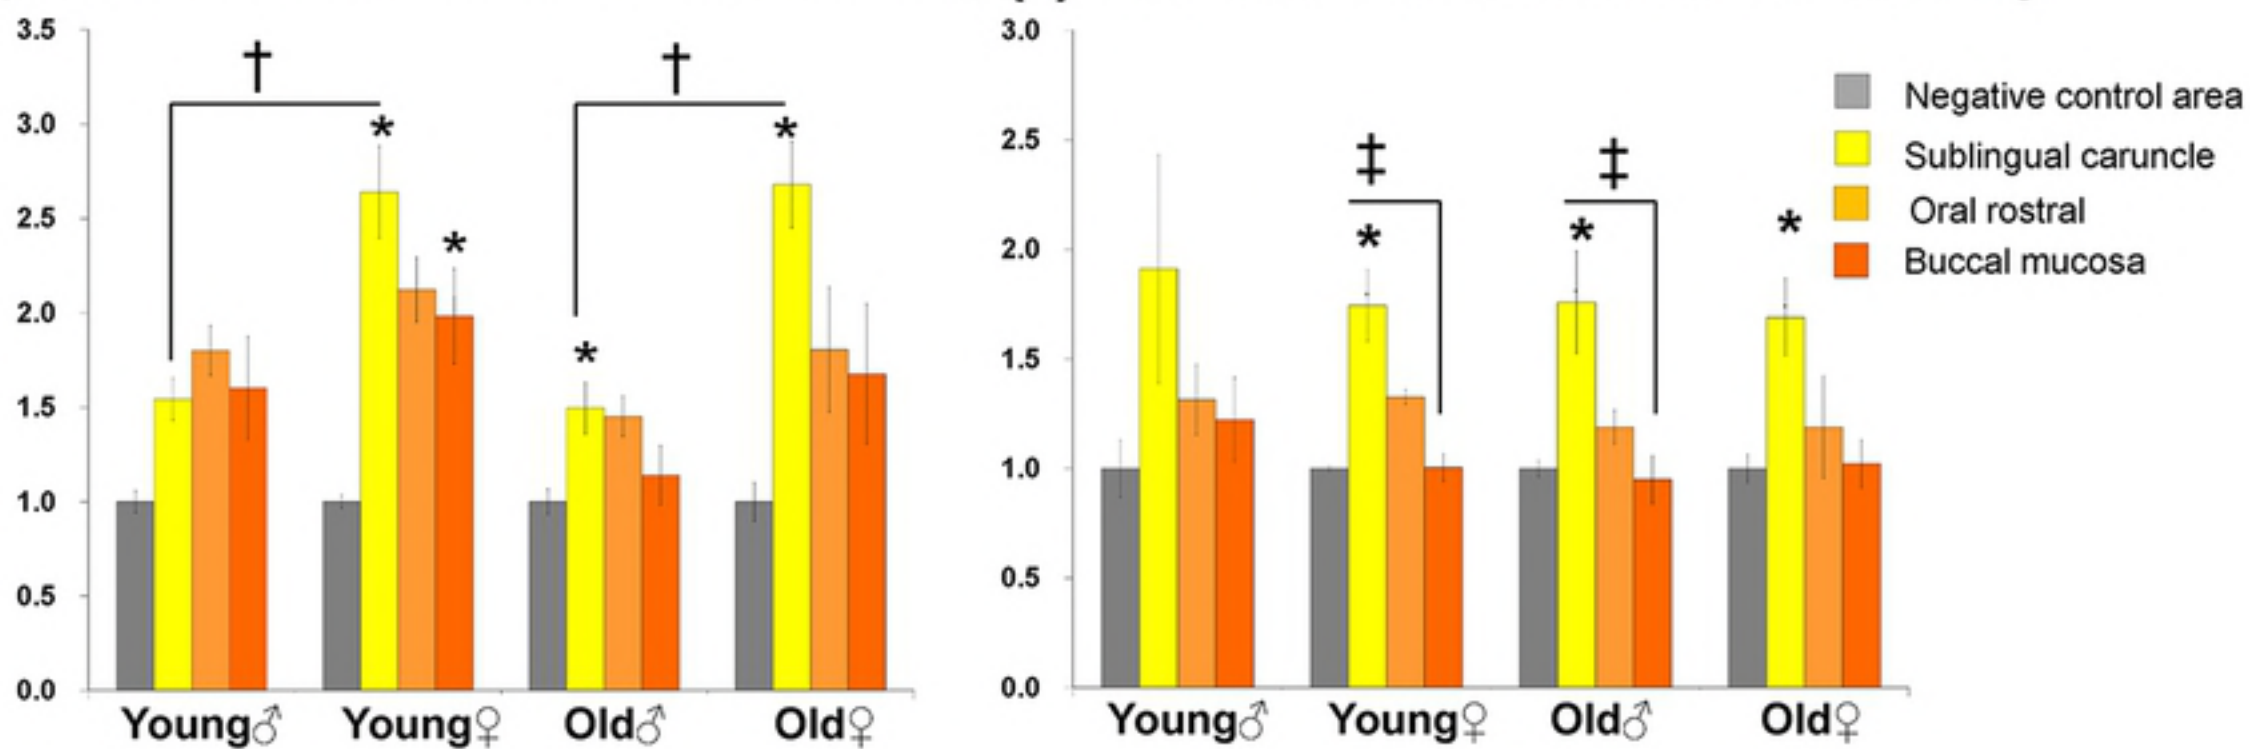



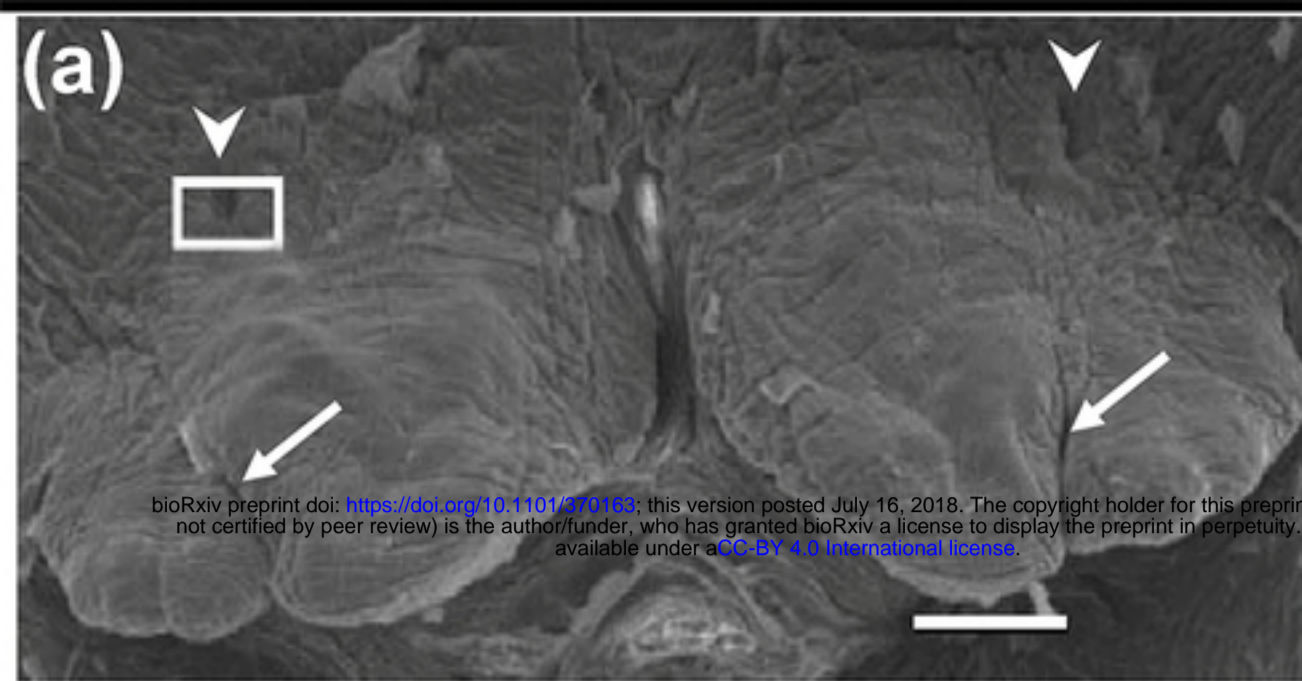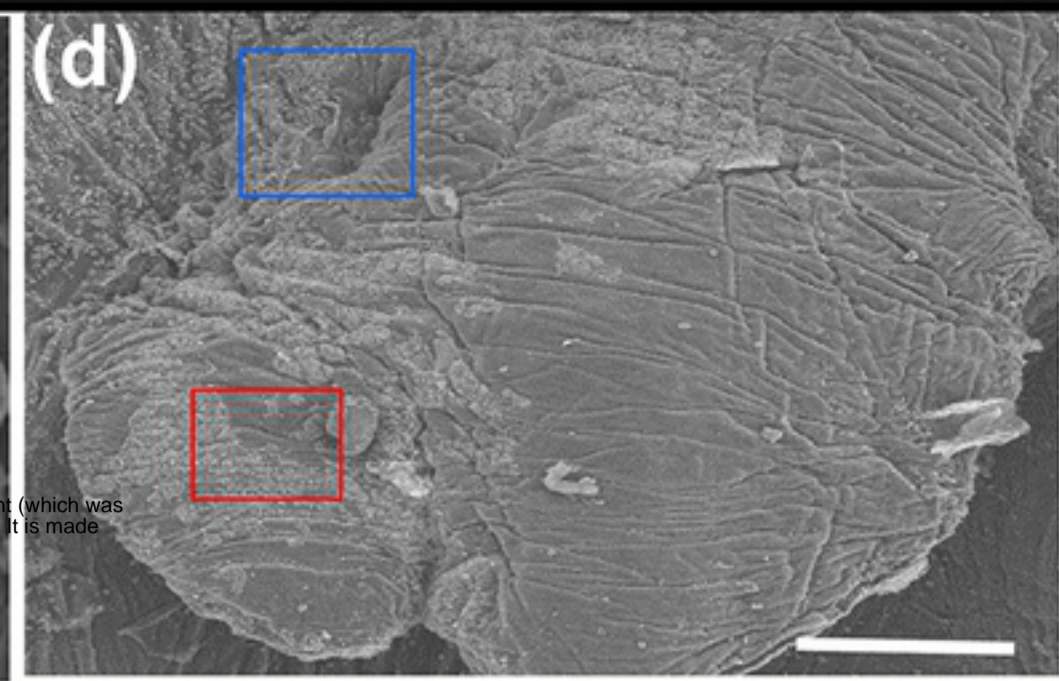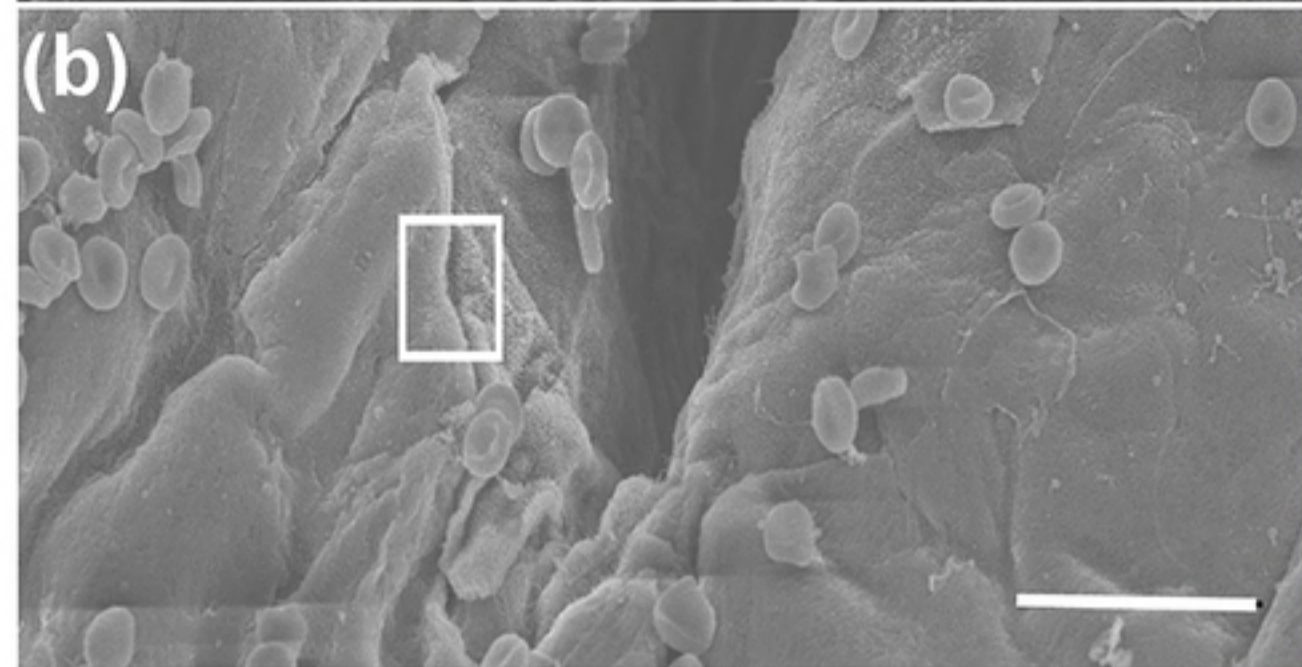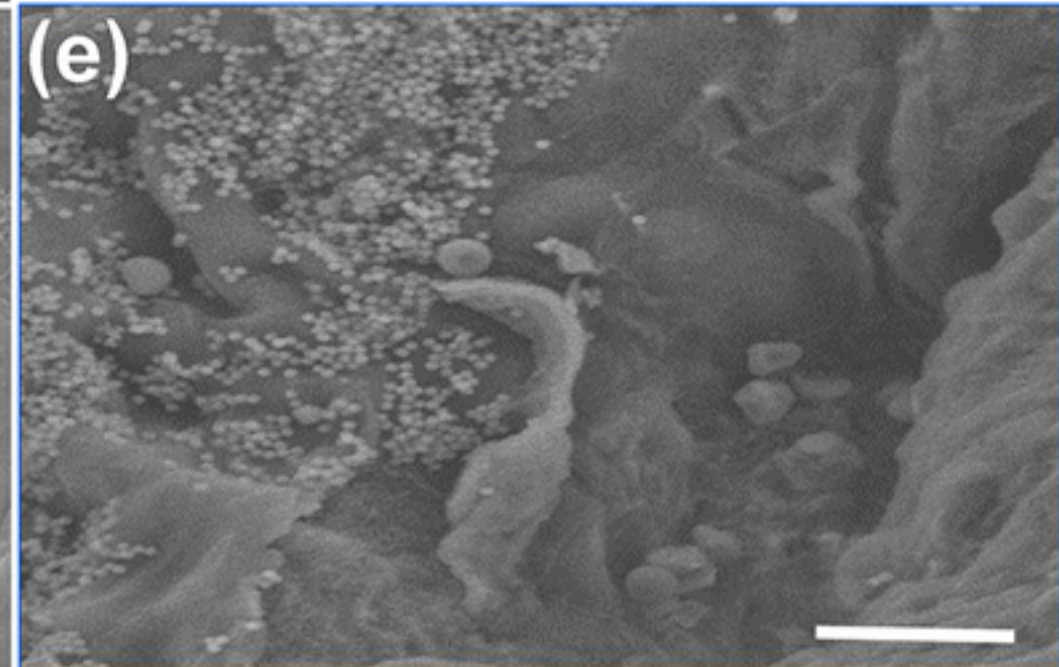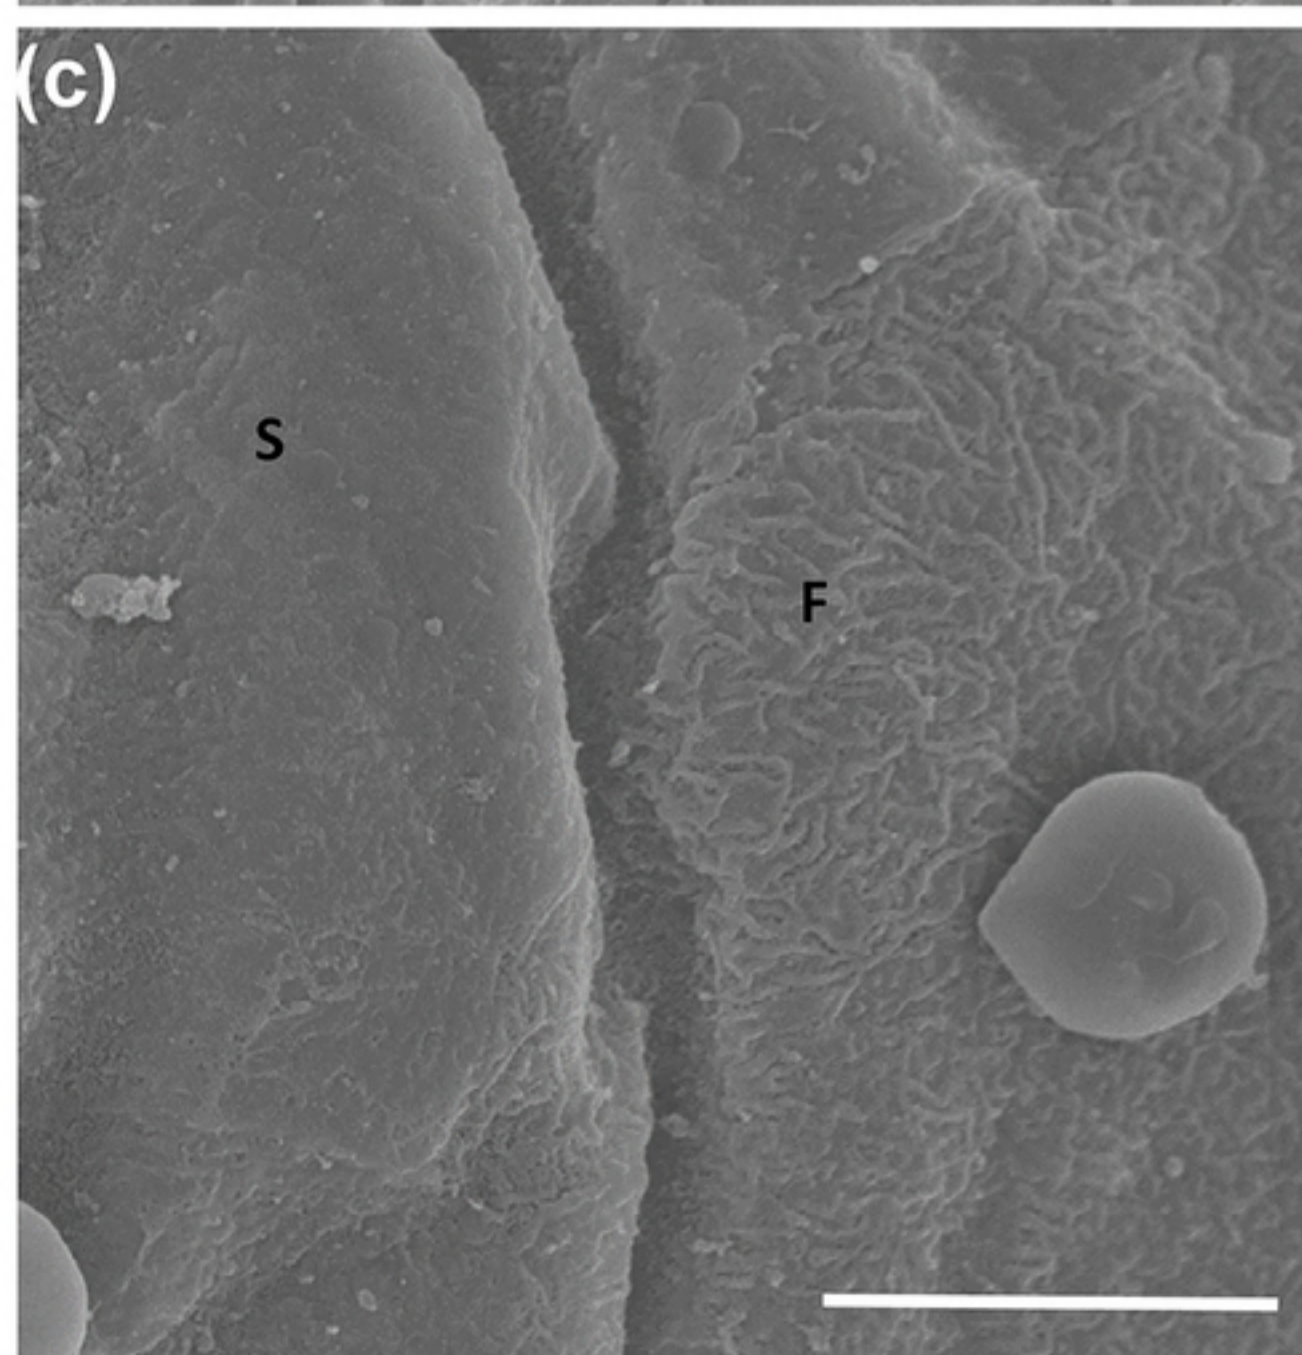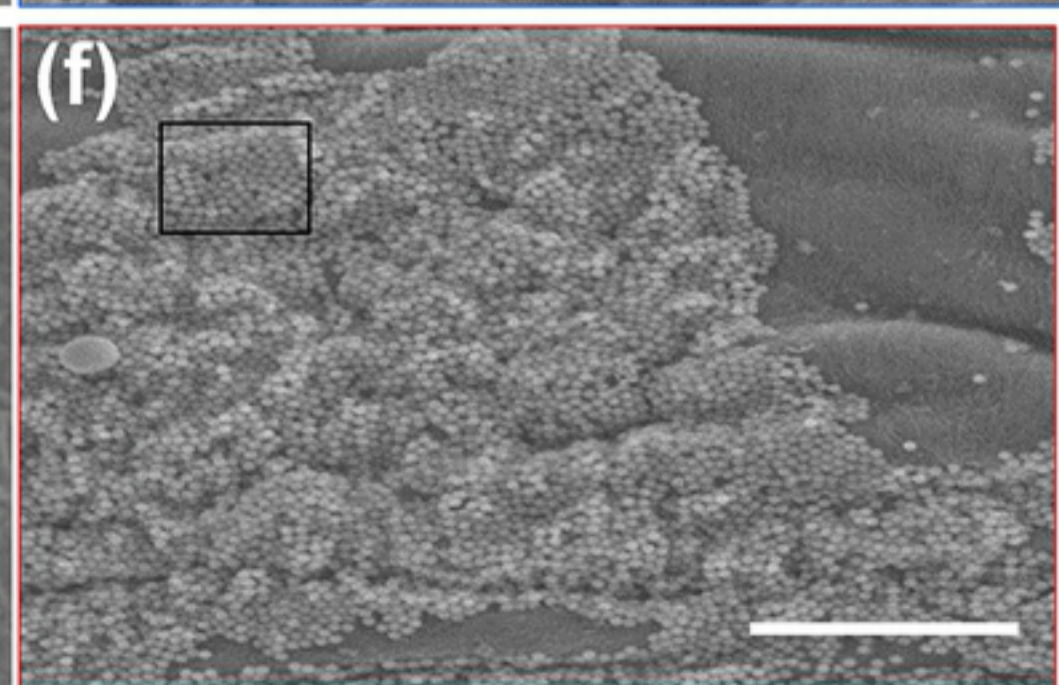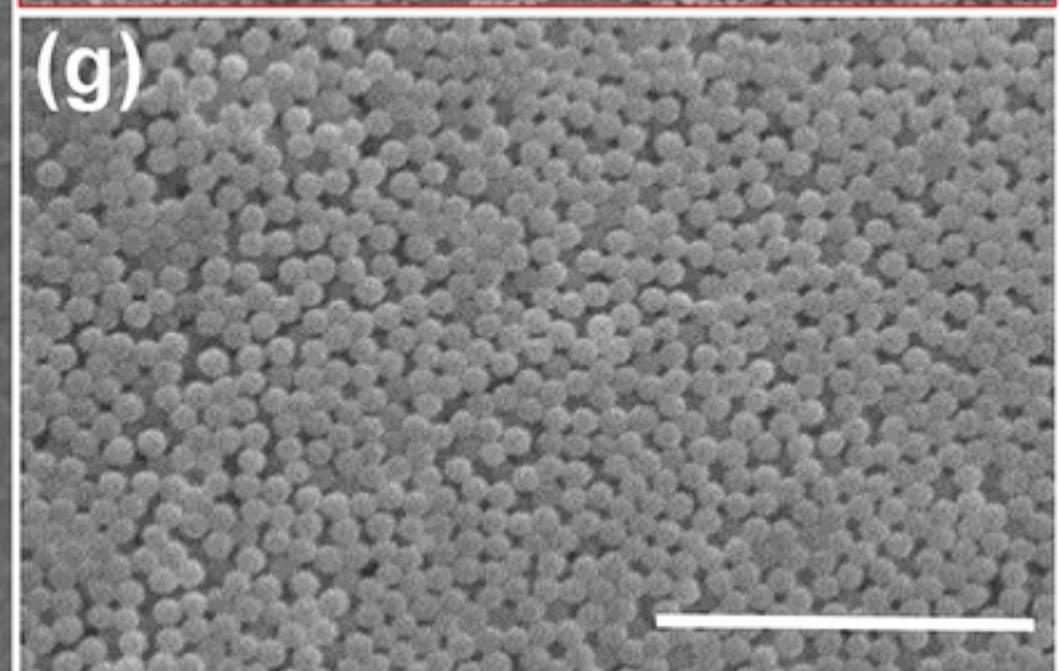

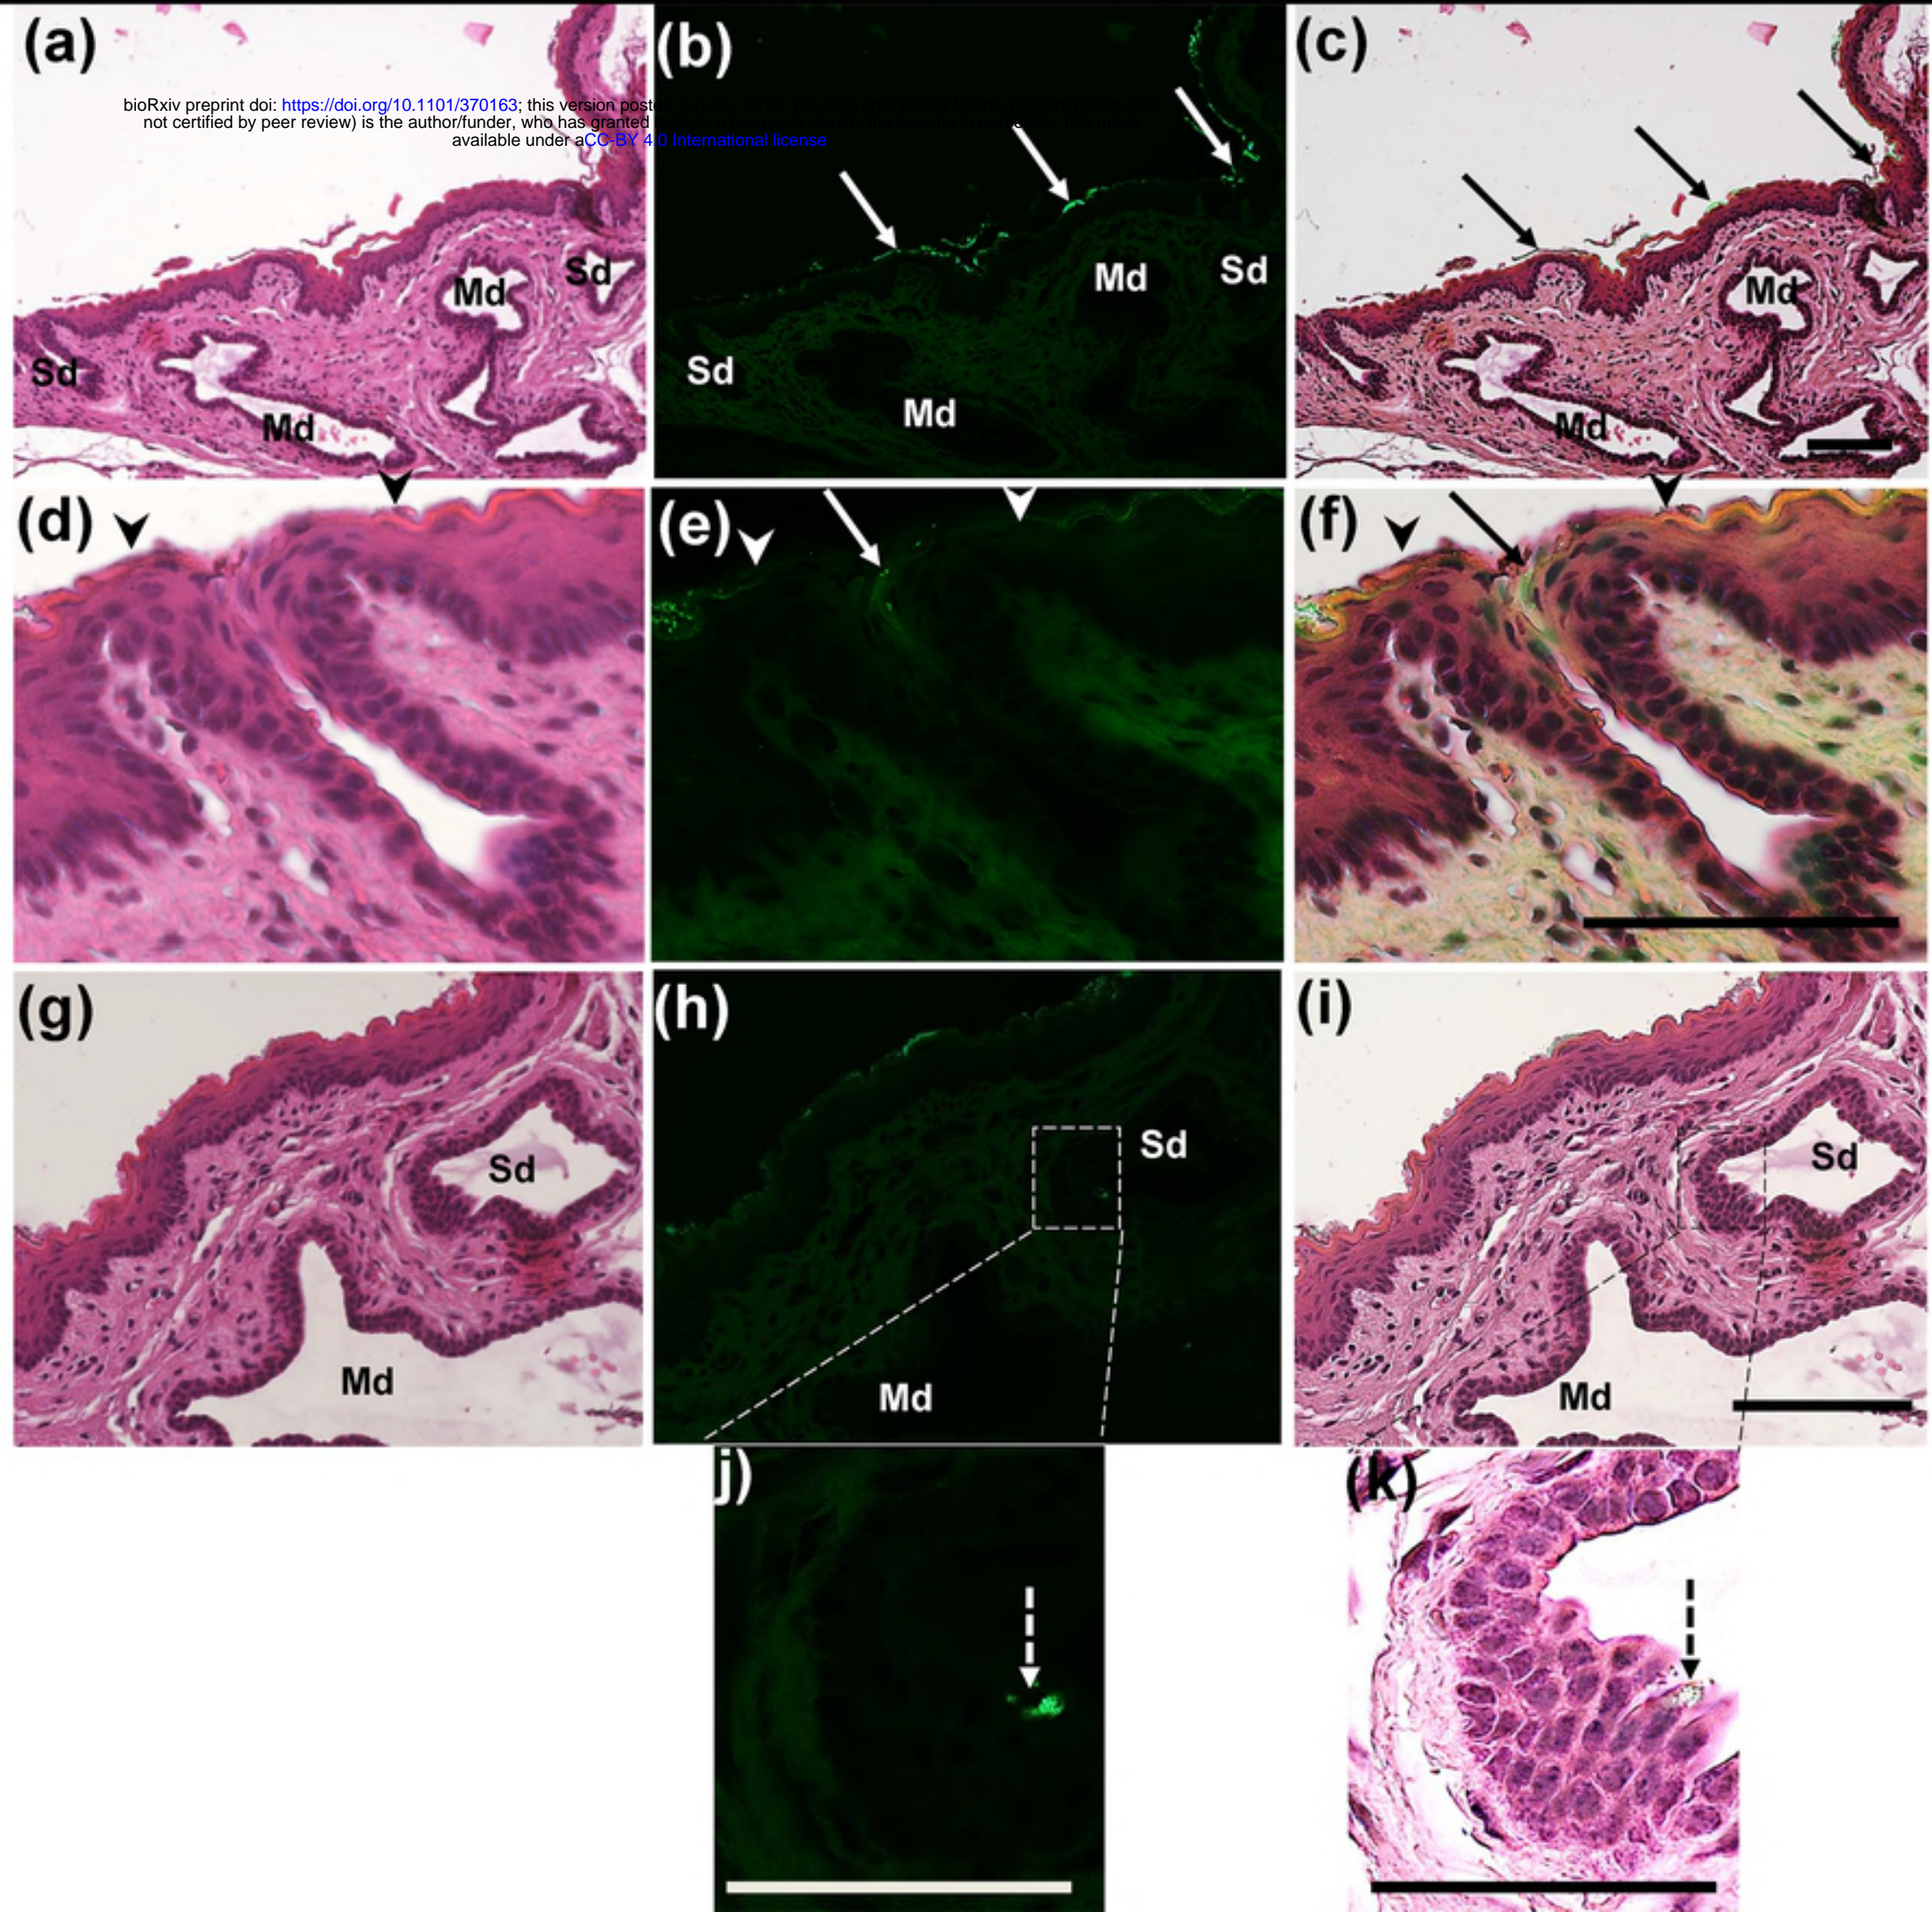

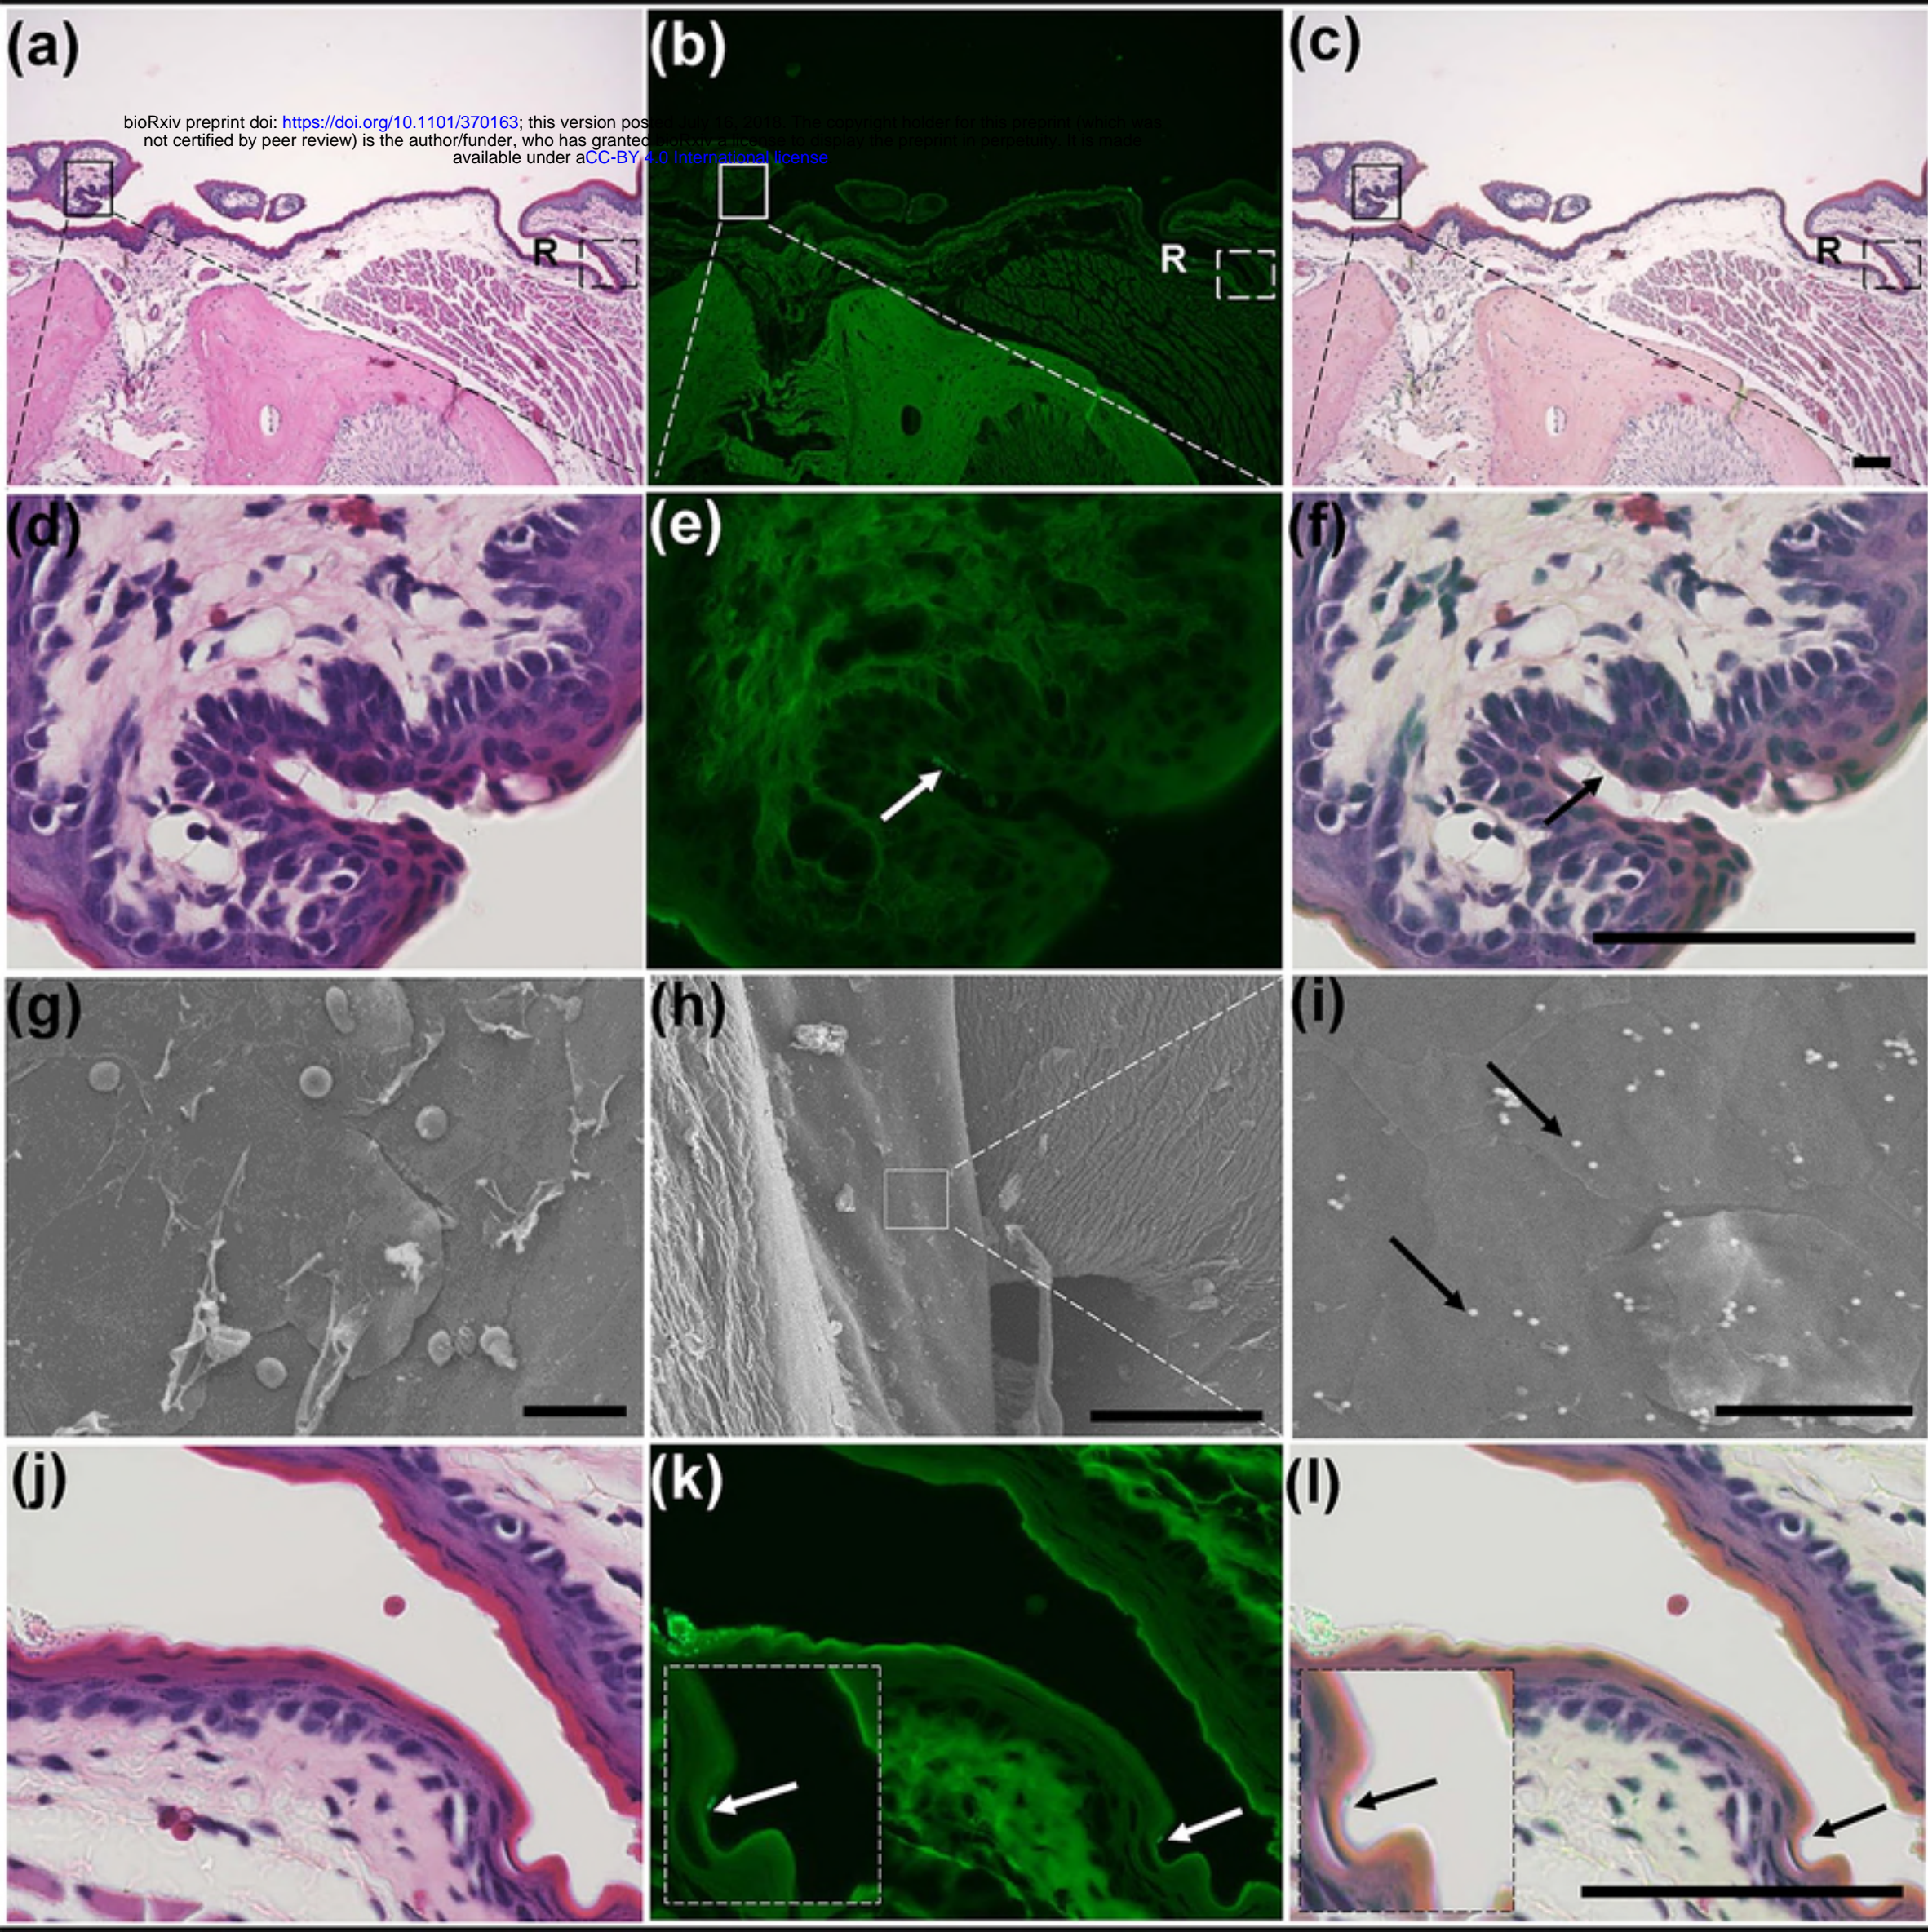

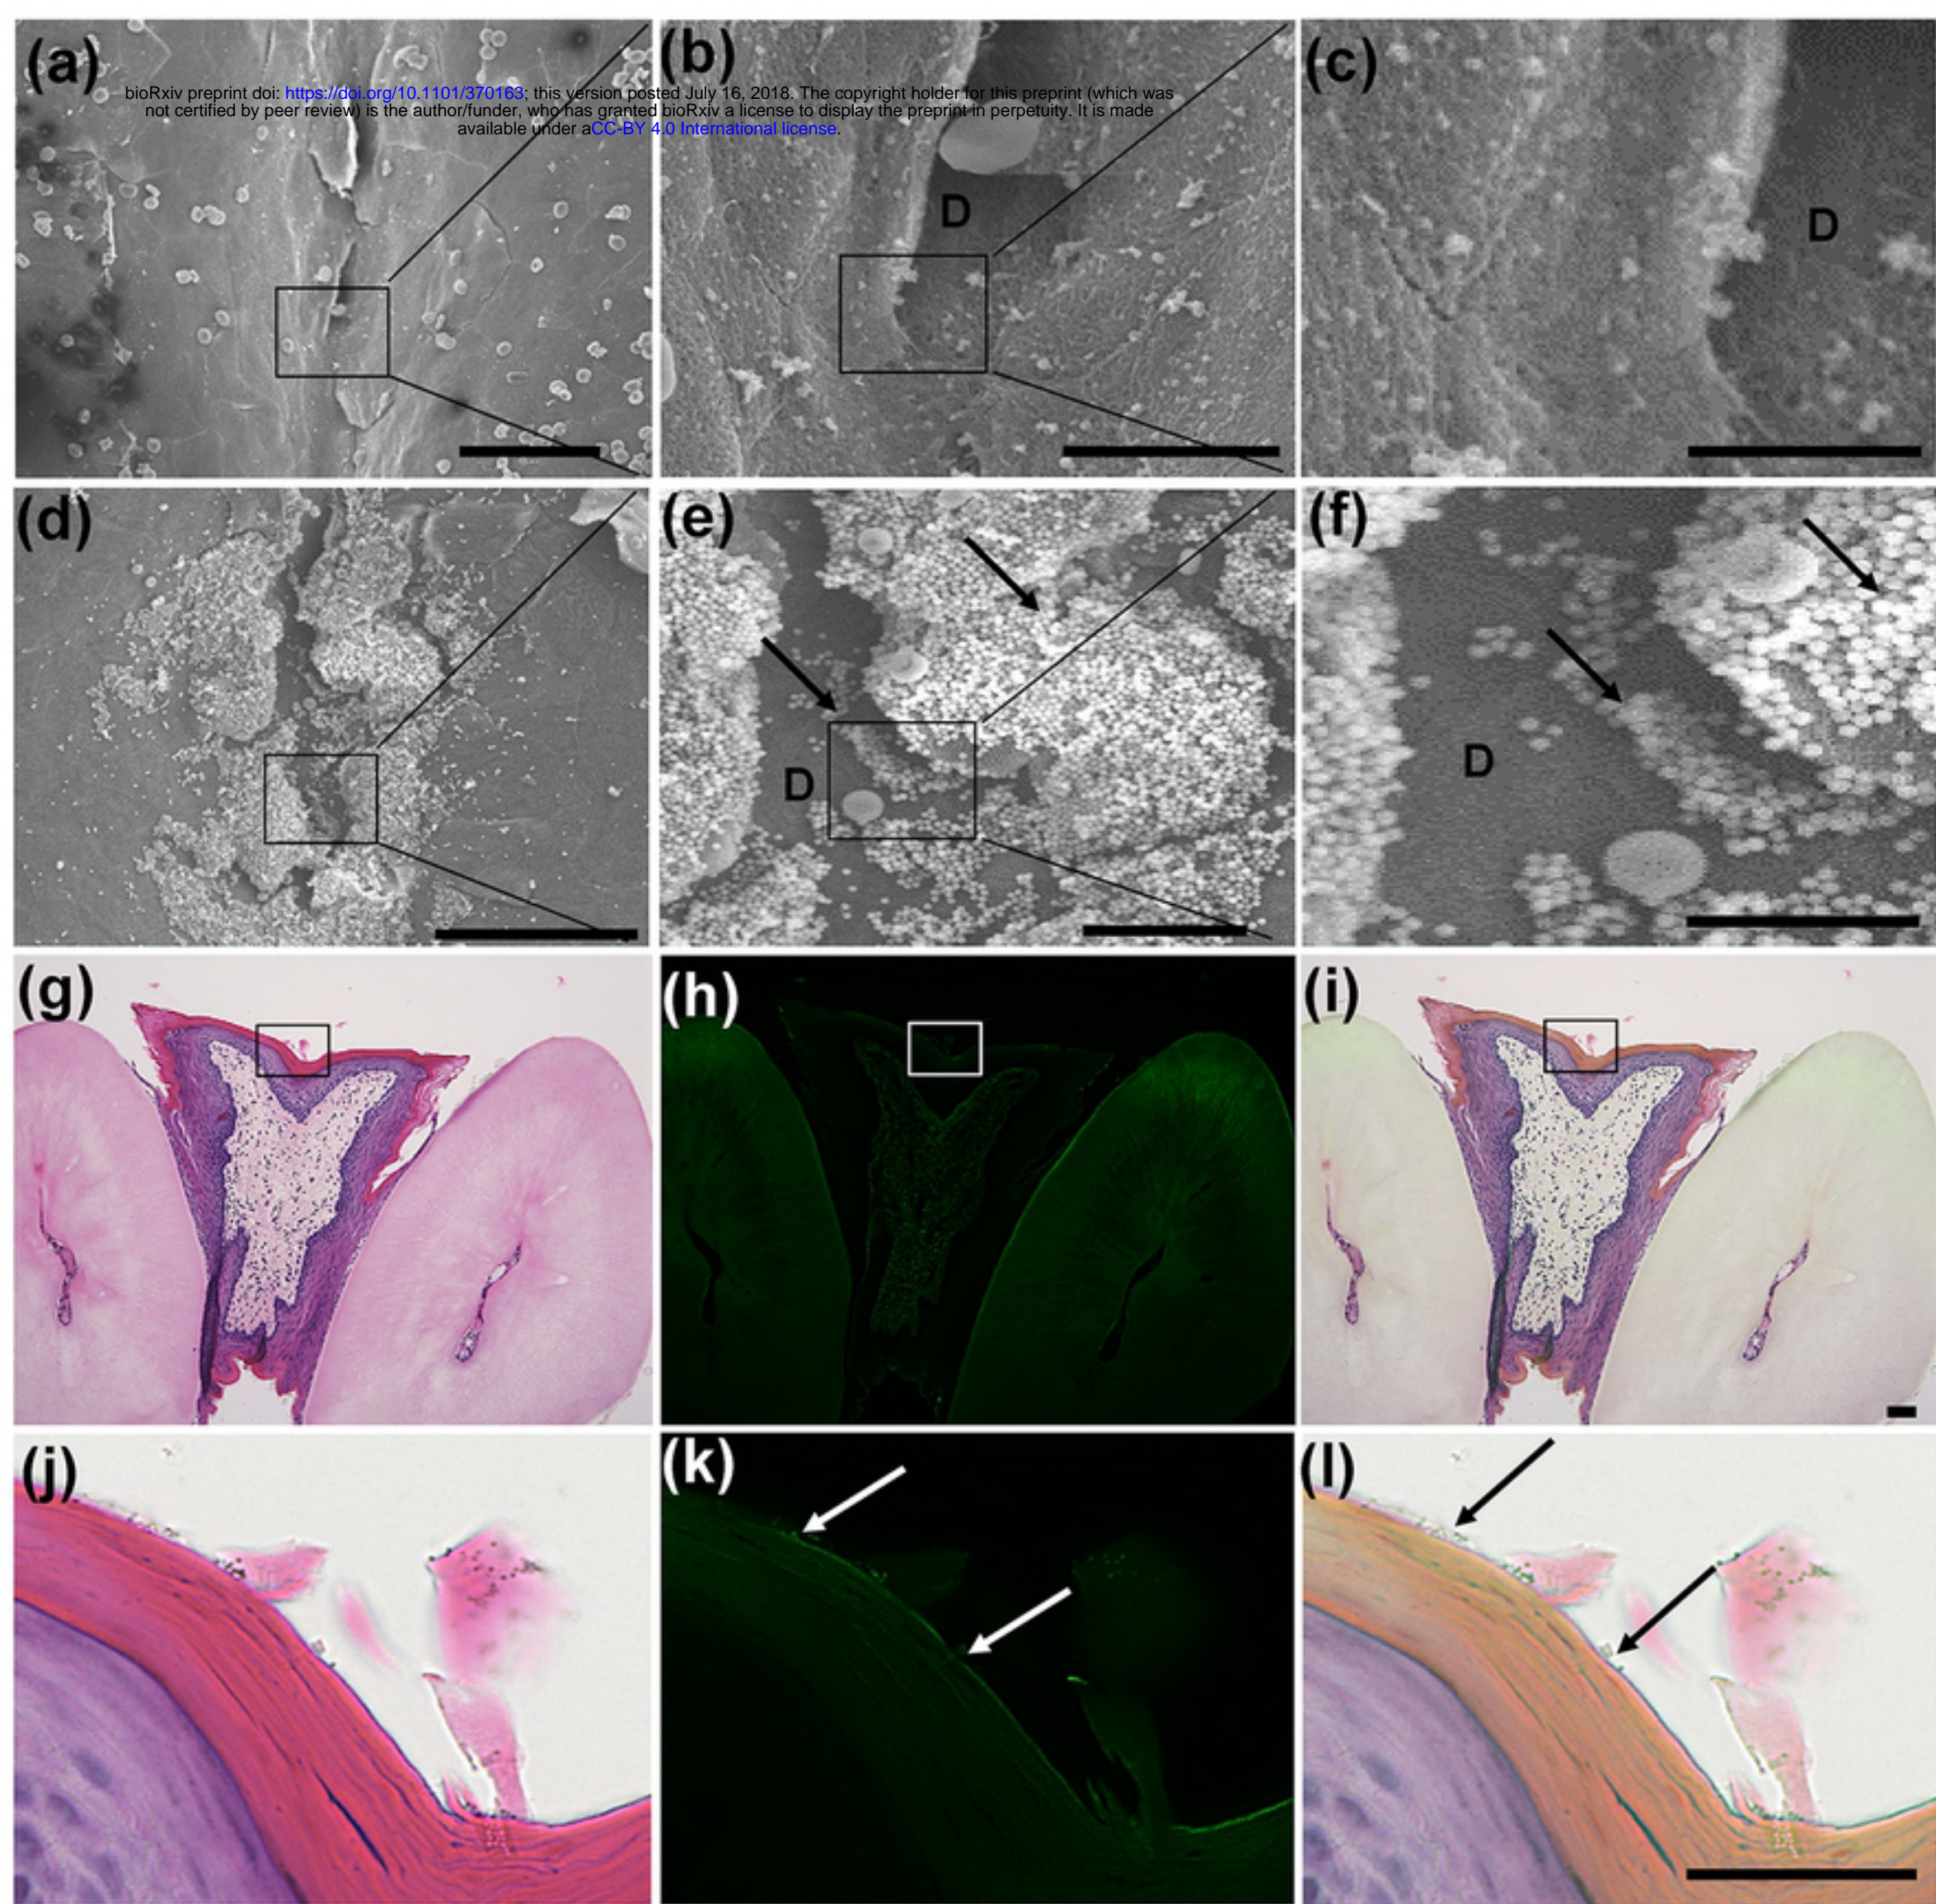

Source: https://www.biorxiv.org/content/10.1101/370163v1.full.pdf
